# Supplementary material for: A macrophage-based screen identifies antibacterial compounds selective for intracellular Salmonella Typhimurium
Source: PubMed Central journal article supplement (PMC6331611; doi:10.1038/s41467-018-08190-x), 2019-01-14
Supplement: 41467_2018_8190_MOESM1_ESM.pdf [file 41467_2018_8190_MOESM1_ESM.pdf]

## SUPPLEMENTARY INFORMATION

**A macrophage-based screen identifies antibacterial compounds selective for intracellular *Salmonella* Typhimurium**

Ellis et al.

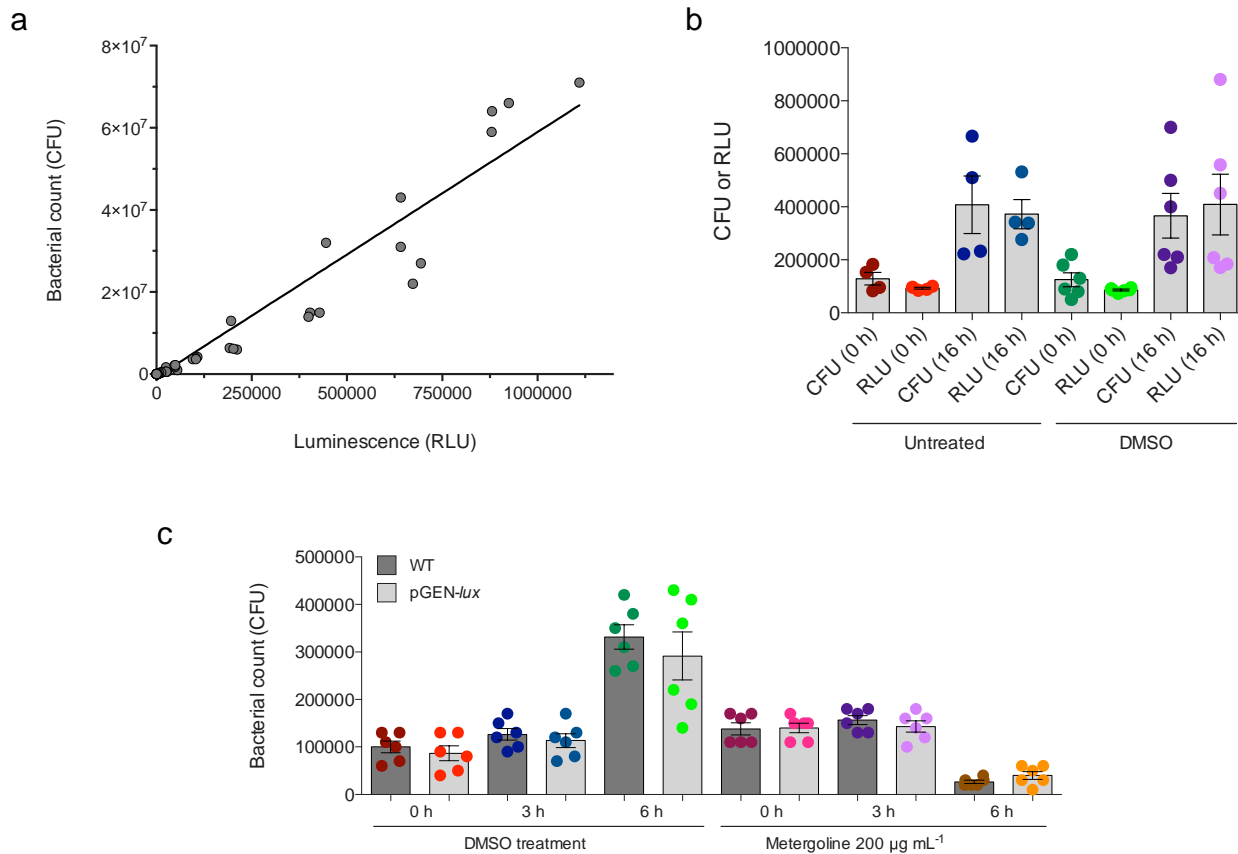

**Supplementary Figure 1.** Optimization of intracellular screening workflow. **a** Colony forming unit (CFU) to luminescence correlation from *S. Tm* transformed with the pGEN plasmid expressing constitutive luciferase from the *em7* promoter (pGEN-*lux*). **b** Luminescence (relative light units, RLU) and CFU of *S. Tm* transformed with pGEN-*lux*, internalized in untreated (left) or DMSO-treated (right) RAW264.7 macrophages, measured directly after gentamicin treatment to kill extracellular bacteria (0 h) and 16 h later. Bar plots depict the mean of 4-6 biological replicates, error bars indicate s.e.m. **c** *S. Tm* (dark grey) and *S. Tm* transformed with pGEN-*lux* (light grey) were internalized into RAW264.7 macrophages and treated with DMSO (left) or 200 µg mL<sup>-1</sup> metergoline (right). Macrophages were lysed and CFU were enumerated immediately after gentamicin treatment (0 h), at 3 h post-infection, and at 6 h post-infection. Bar plots depict the mean of 6 biological replicates, error bars indicate s.e.m.

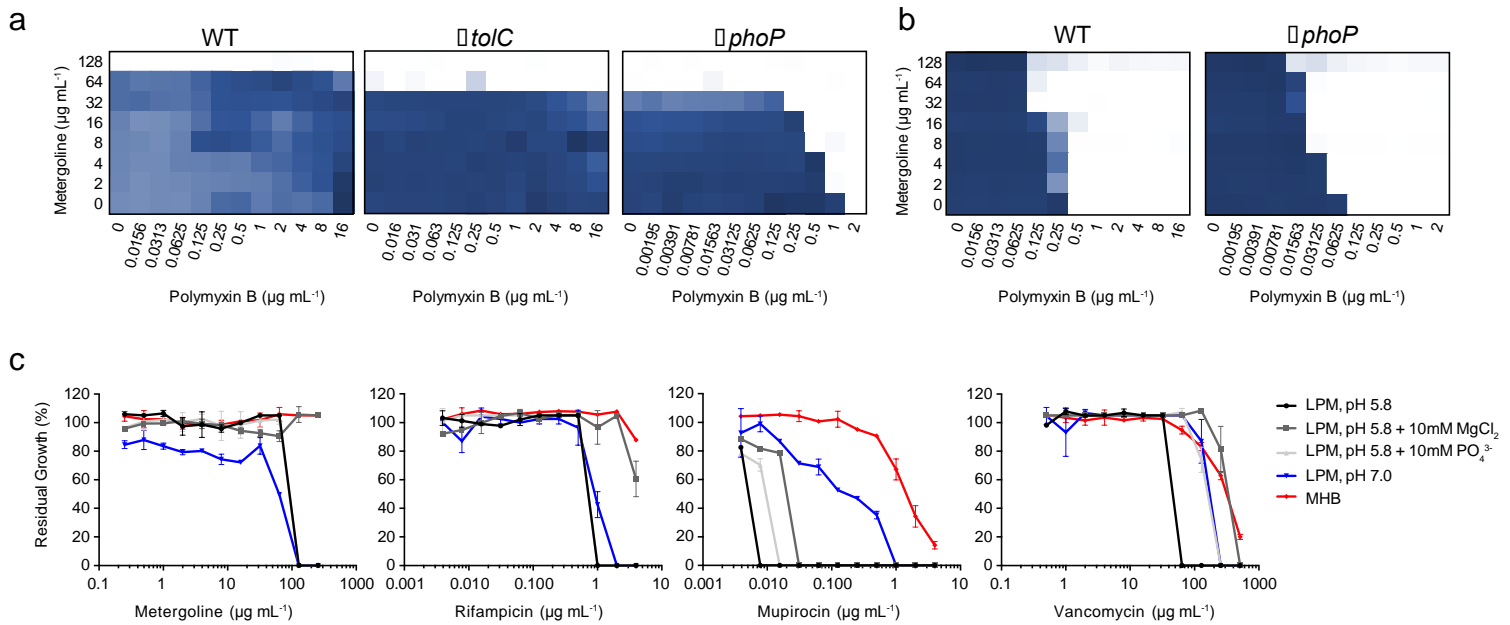

**Supplementary Figure 2.** Impact of LPM or mutants on metergoline activity. **a** Chequerboard broth microdilution assay measuring synergy between metergoline and polymyxin B in LPM. *S. Tm* WT,  $\Delta tolC$ , or  $\Delta phoP$  were grown in LPM with the indicated concentrations of polymyxin B and metergoline. Darker colour indicates higher cell density. **b** Chequerboard broth microdilution assay measuring synergy between metergoline and polymyxin B in MHB. In **a** and **b**, data shown are representative of at least two experiments. **c** Potency analysis of metergoline, rifampicin, mupirocin, or vancomycin in MHB or variants of LPM. LPM was adjusted to pH 7.0 or supplemented with 10 mM  $\text{MgCl}_2$  or 10 mM  $\text{PO}_4^{3-}$  as indicated. Residual growth was calculated as a percentage relative to an untreated control in each media. Points and error bars show the mean and s.e.m. from two biological replicates.

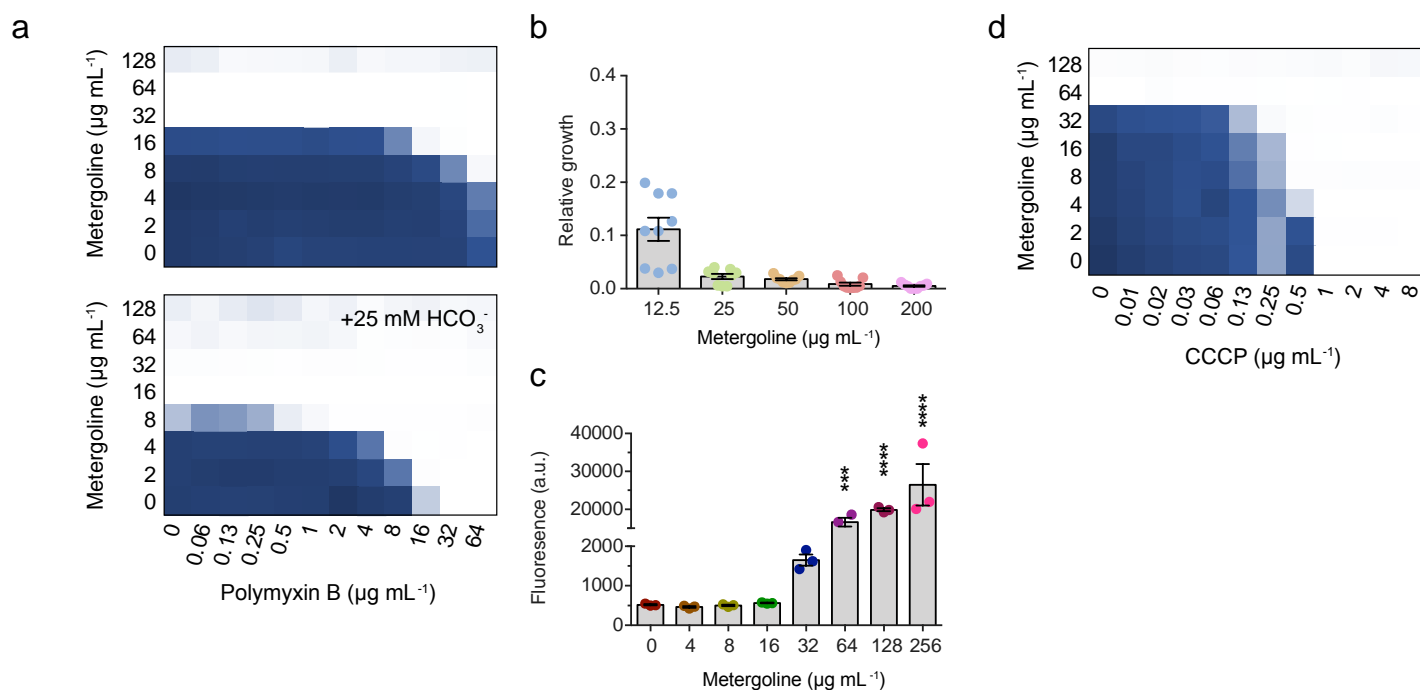

**Supplementary Figure 3.** Activity of metergoline against methicillin-resistant *Staphylococcus aureus* (MRSA). **a** Chequerboard broth microdilution assay showing synergy between polymyxin B and metergoline against MRSA grown in MHB, or MHB supplemented with 25 mM bicarbonate ( $\text{HCO}_3^-$ ). **b** Intracellular replication of MRSA measured in bone-marrow derived macrophages isolated from C57BL/6 mice. Relative growth reflects replication over 4 h, normalized to bacterial growth in macrophages treated with DMSO. Metergoline was added at the indicated concentrations. Bar plots depict the mean of 9 biological replicates, error bars indicate s.e.m. **c** The effect of metergoline on cytoplasmic membrane potential was measured by the DiSC<sub>3</sub>(5) assay, following a 1 min exposure to the indicated concentrations of metergoline. Bar plots depict the mean fluorescence of three biological replicates, error bars indicate s.e.m. All groups were compared to 0  $\mu\text{g mL}^{-1}$  metergoline via one-way ANOVA with Holm-Sidak's multiple test correction. \*\*\*P<0.001, \*\*\*\*P<0.0001. **d** Chequerboard analysis showing synergy between metergoline and CCCP against MRSA grown in MHB. In **a** and **b** darker colour indicates higher bacterial growth and data are representative of two experiments.

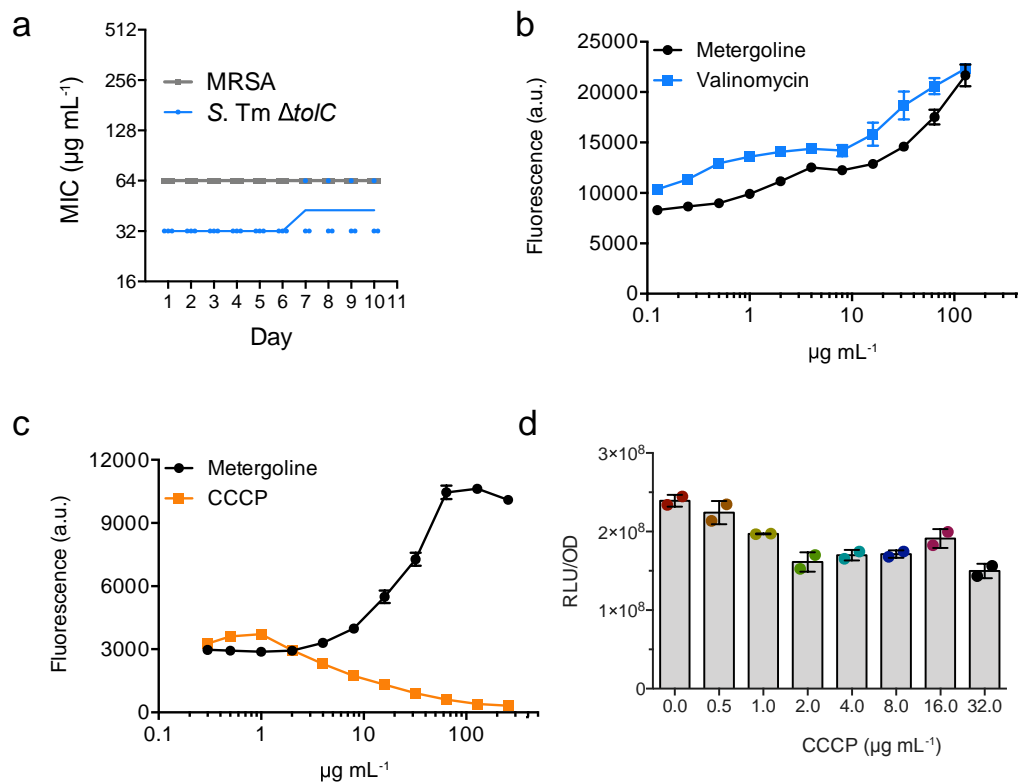

**Supplementary Figure 4.** Serial-passage experiment with metergoline and control experiments for DiSC<sub>3</sub>(5) and ATP assays. **a** The MIC of metergoline against three independent lineages of MRSA or  $\Delta tolC$  *S. Tm* was measured daily for 10 d (see Methods). Cells from the highest concentration of metergoline with detectable growth were used each day to inoculate MIC plates. Points show the MIC for individual lineages and the connected line shows the mean MIC. **b-c** Effect of metergoline, valinomycin (**b**), and CCCP (**c**) on inner membrane potential was measured by the DiSC<sub>3</sub>(5) assay. WT *S. Tm* was grown in MHB with 10 mM EDTA to an OD<sub>600</sub> ~ 1. Cells were loaded with DiSC<sub>3</sub>(5) prior to 1 min incubation with compound. Note that 100 mM KCl was added to cells in **b** as valinomycin in K<sup>+</sup>-dependent. Error bars show s.e.m. for technical triplicates. **d** WT *S. Tm* was grown in MHB with 1 mM EDTA to OD<sub>600</sub> = 0.2 and then grown in the presence of CCCP for 30 min at 37°C. Cellular ATP levels were estimated by luciferase activity (relative light units, RLU) normalized to optical density (OD<sub>600</sub>). Bar plots depict the mean of two biological replicates, error bars indicate s.d.

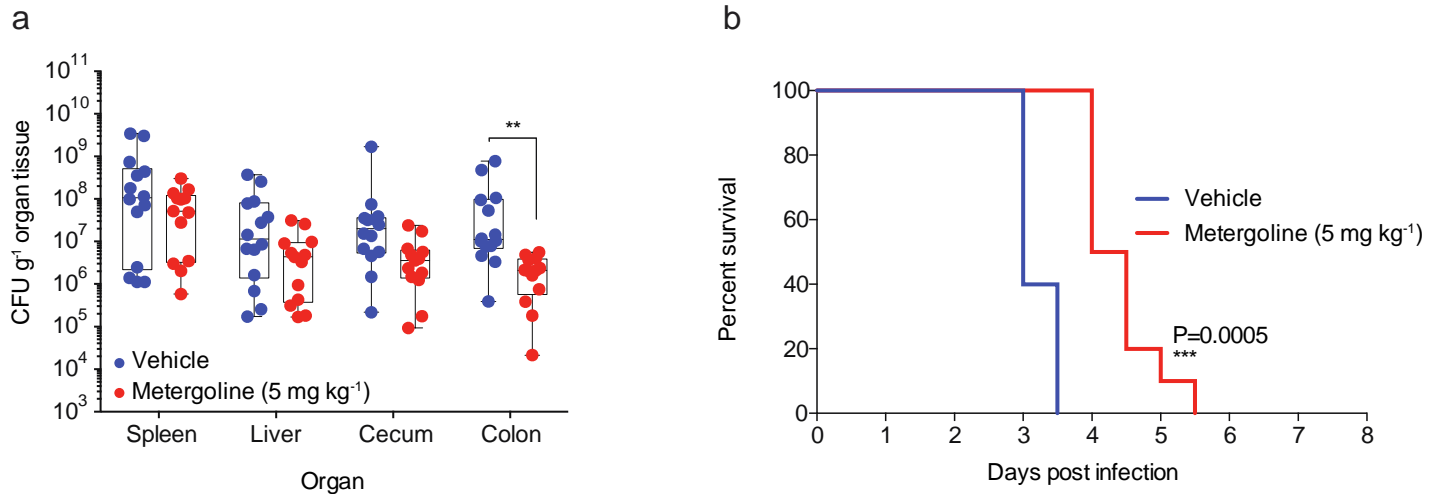

**Supplementary Figure 5.** *In vivo* efficacy of metergoline following delayed treatment administration. **a** Groups of mice were treated twice daily (every 12 h) with metergoline (5 mg kg<sup>-1</sup>, red), or DMSO (5% in DMEM, blue) by i.p. injection. Treatments were administered beginning 12 h after initial infection. Mice were euthanized at experimental endpoint (60 h post-infection). Bacterial load in the spleen, liver, cecum, and colon was determined by selective plating in the presence of 150 µg mL<sup>-1</sup> streptomycin. Data shown are from three separate experiments (n=5 per group). Box plot whiskers show the minimum to maximum values per group, lines in box plots show the median of each group. Groups were analyzed with a two-way ANOVA and corrected for multiple comparisons with a Holm-Sidak test. **b** For survival experiments, groups of mice (n=10) were treated twice daily (every 12 h) with metergoline (5 mg kg<sup>-1</sup>, red), or DMSO (5% in DMEM, blue) by i.p. injection, and were euthanized at clinical endpoint. Treatments were administered beginning 12 h after initial infection. Survival curves shown are from two independent experiments. Groups were analyzed with a Gehan-Breslow-Wilcoxon test for survival curve differences. \*P<0.05, \*\*P<0.01, \*\*\*P<0.001, \*\*\*\*P<0.0001.

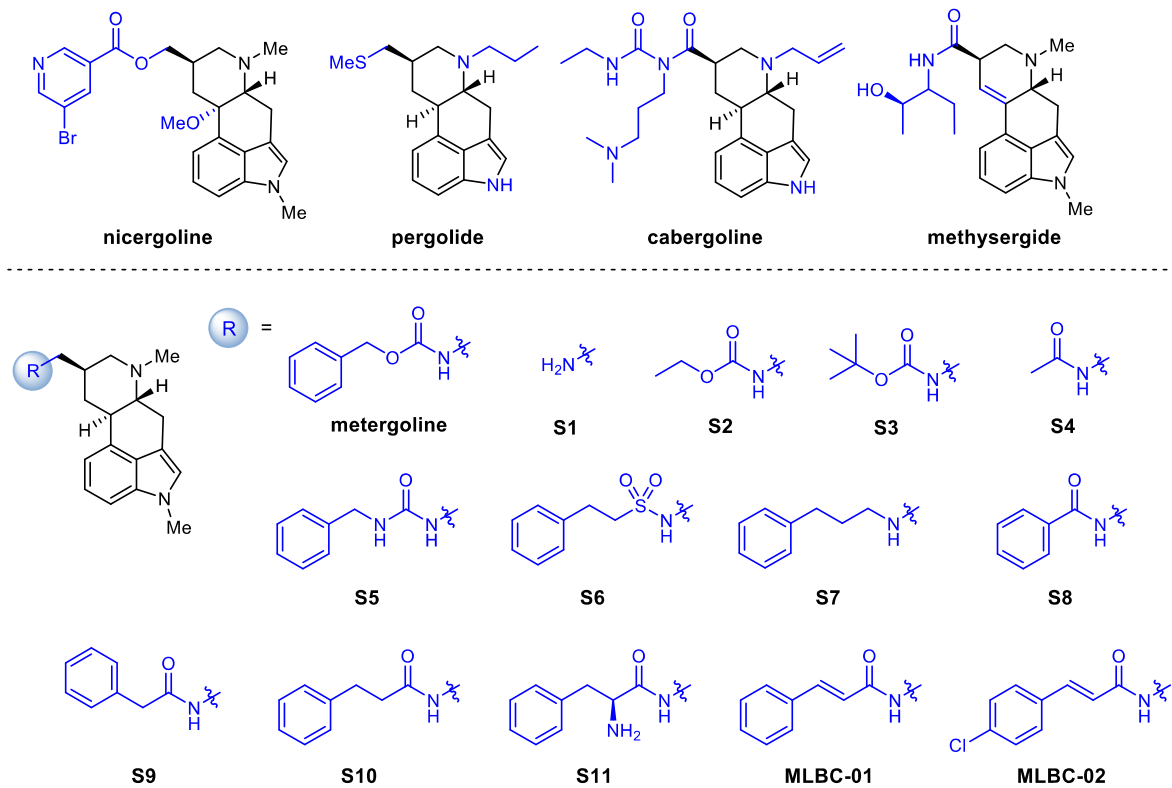

**Supplementary Figure 6** Structure of metergoline analogues. Structural features differing from metergoline are indicated in blue.

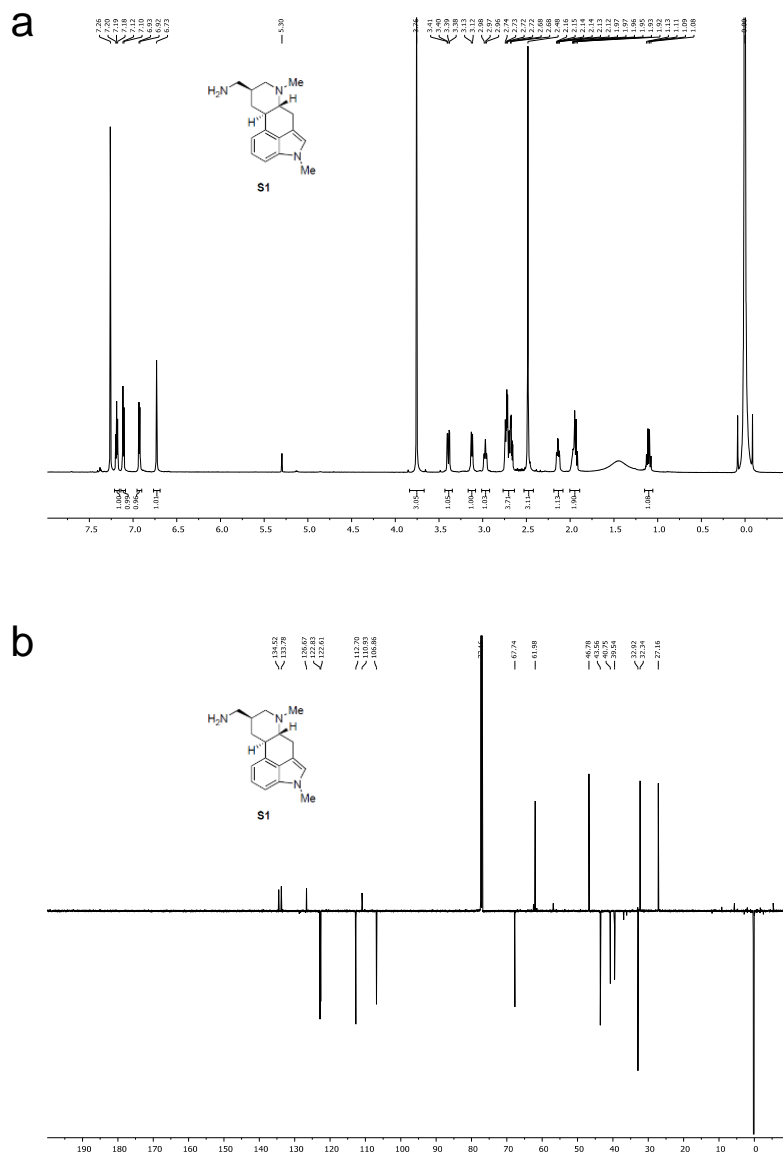

**Supplementary Figure 7.** NMR spectra for aminomethyl ergoline (**S1**). **a**  $^1\text{H}$  NMR, 700 MHz,  $\text{CDCl}_3$ . **b**  $^{13}\text{C}$  NMR, 175 MHz,  $\text{CDCl}_3$ . The structure of compound **S1** is shown.



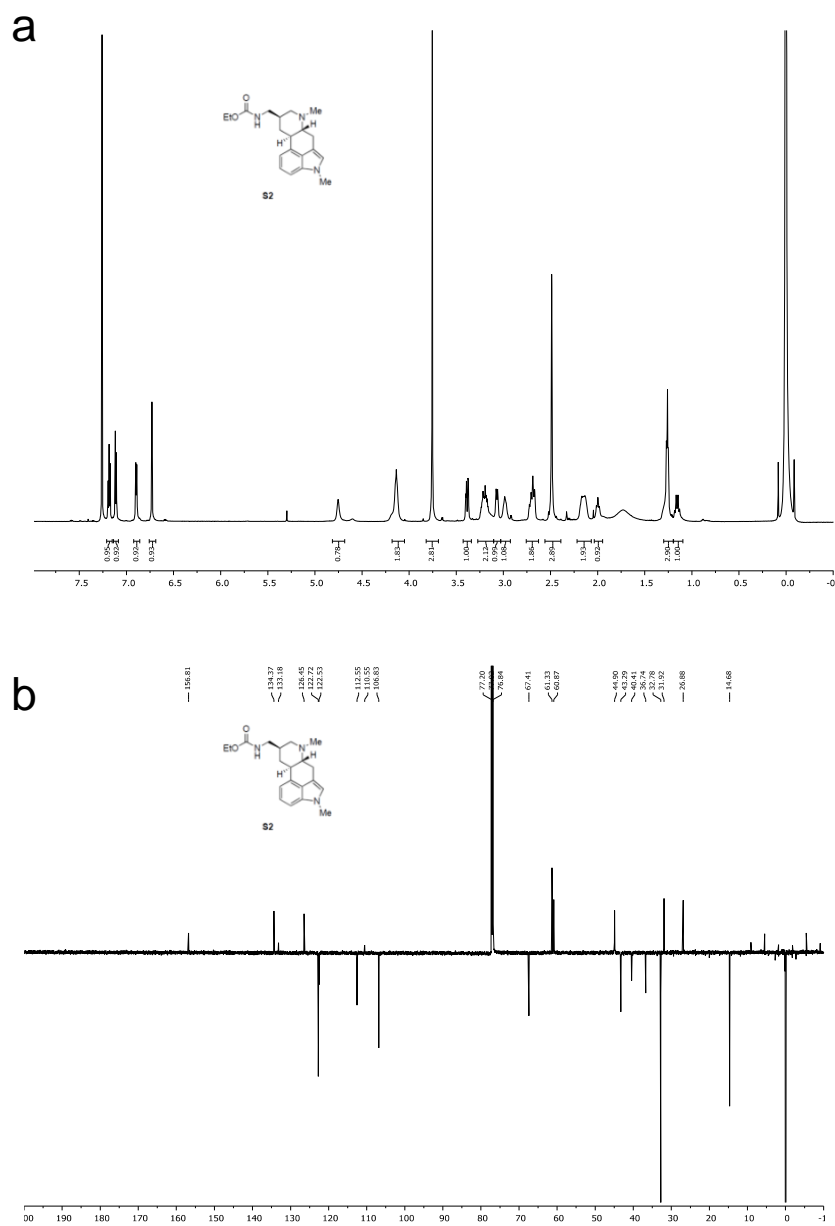

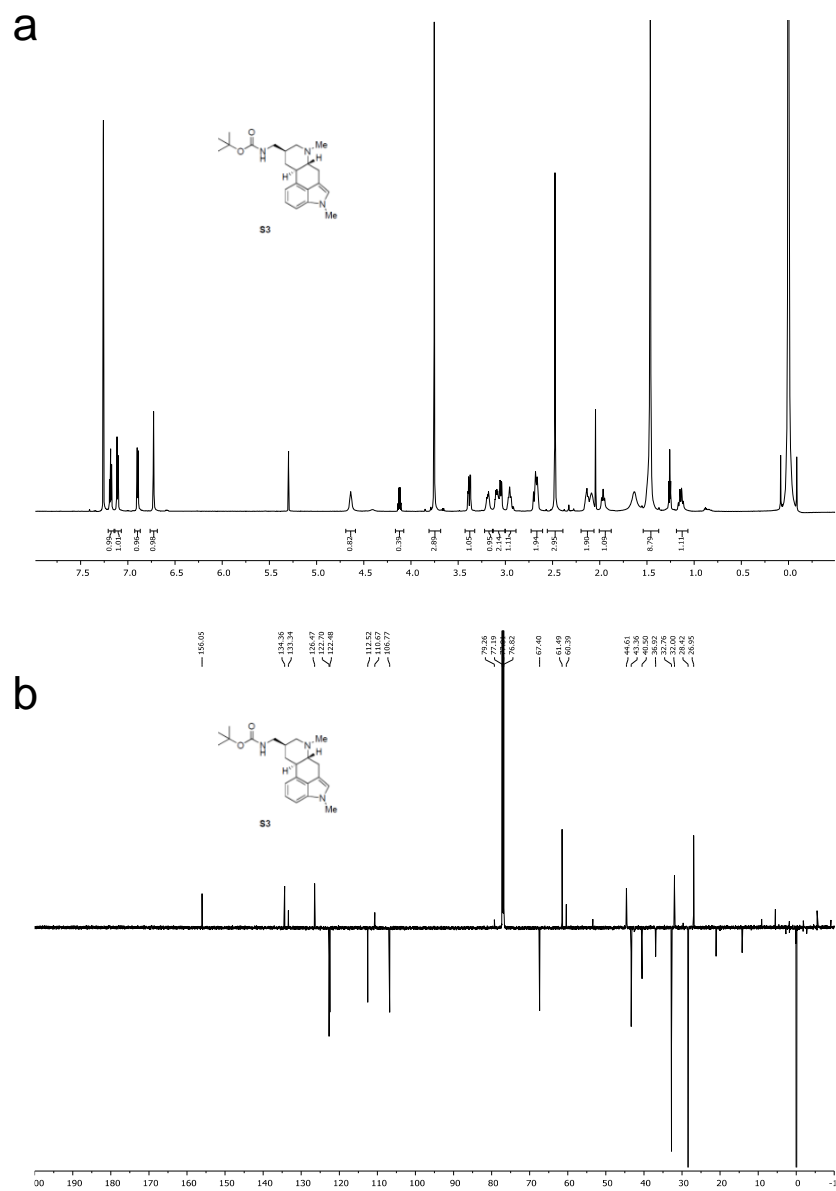

**Supplementary Figure 9.** NMR spectra for *N*-Boc ergoline derivative (**S3**). **a**  $^1\text{H}$  NMR, 700 MHz,  $\text{CDCl}_3$ . **b**  $^{13}\text{C}$  NMR, 175 MHz,  $\text{CDCl}_3$ . The structure of compound **S3** is shown.

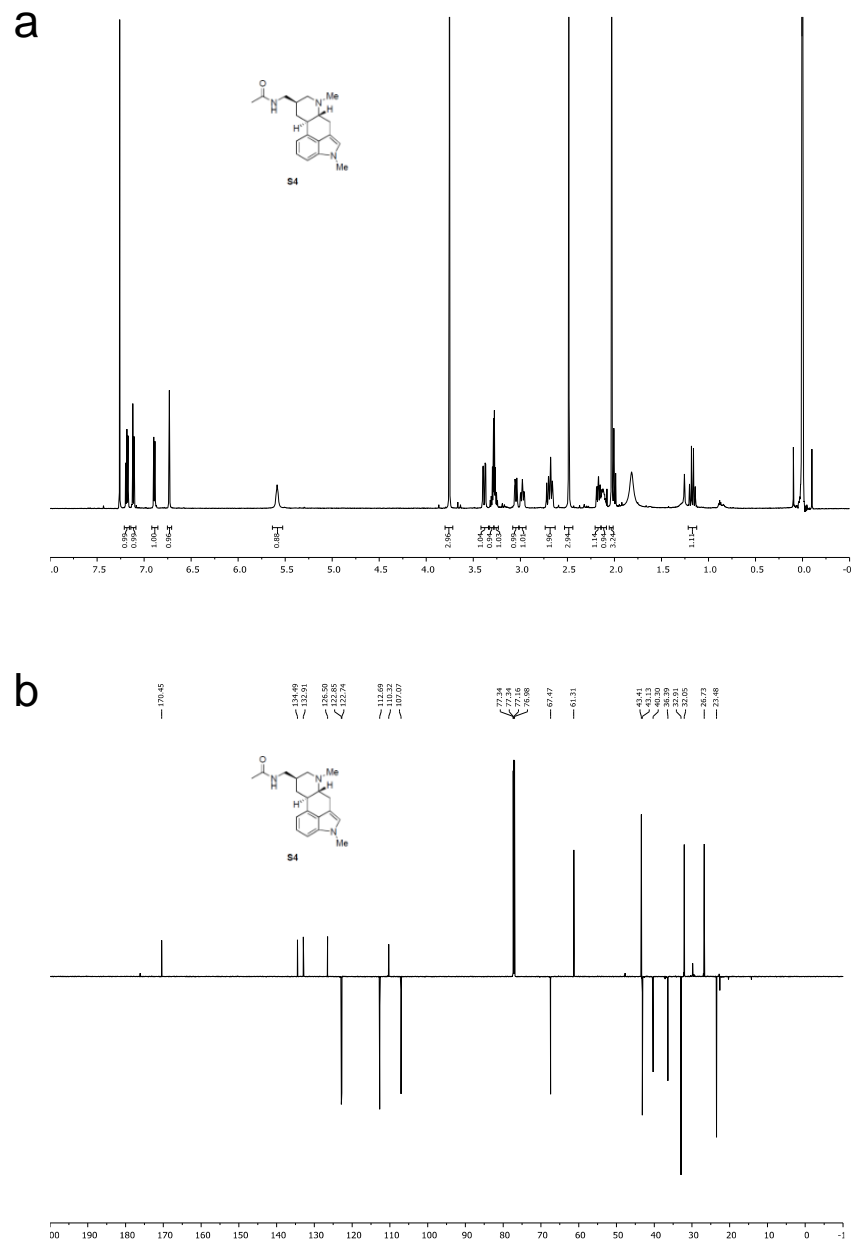

**Supplementary Figure 10.** NMR spectra for *N*-Acetyl ergoline derivative (**S4**). **a**  $^1\text{H}$  NMR, 600 MHz,  $\text{CDCl}_3$ . **b**  $^{13}\text{C}$  NMR, 175 MHz,  $\text{CDCl}_3$ . The structure of compound **S4** is shown.

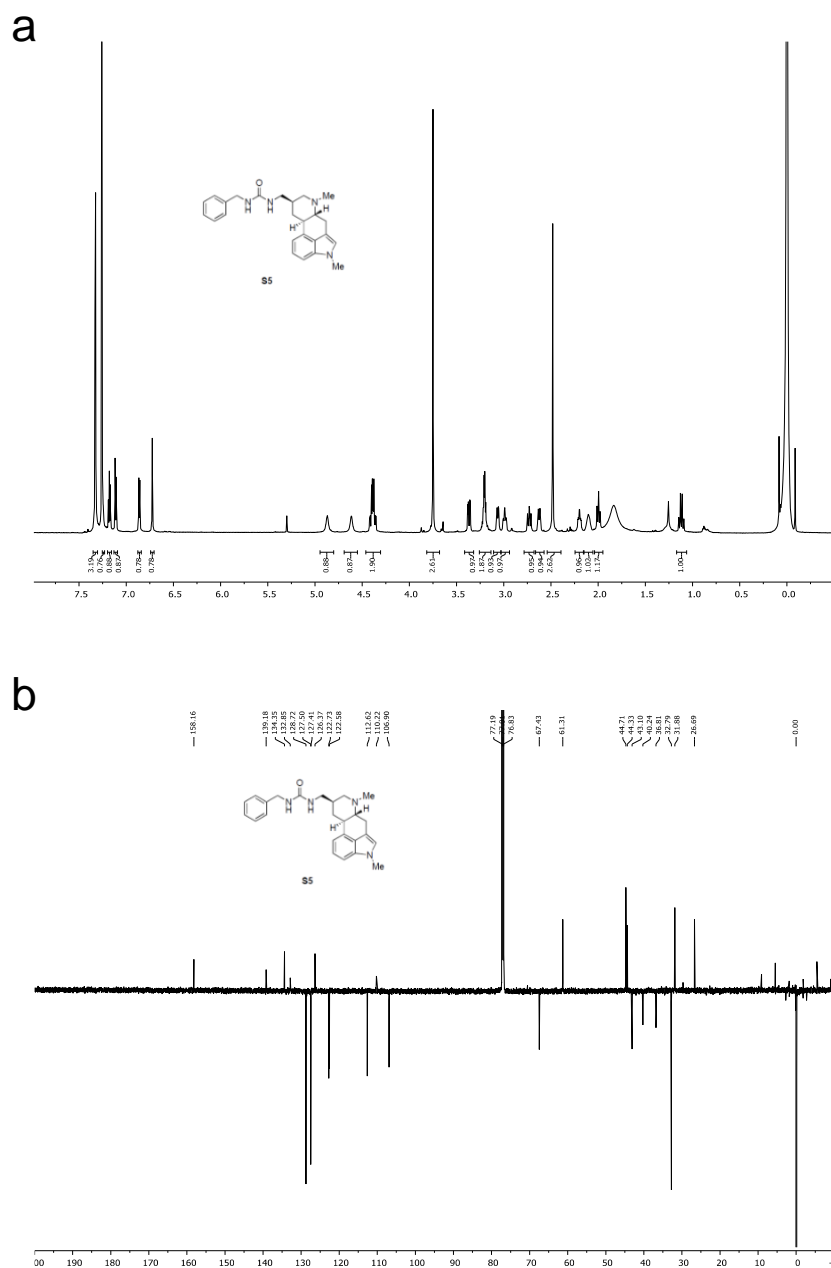

**Supplementary Figure 11.** NMR spectra for *N*-(*N*-Benzyl) urea derivative (**S5**). **a**  $^1\text{H}$  NMR, 700 MHz,  $\text{CDCl}_3$ . **b**  $^{13}\text{C}$  NMR, 175 MHz,  $\text{CDCl}_3$ . The structure of compound **S5** is shown.

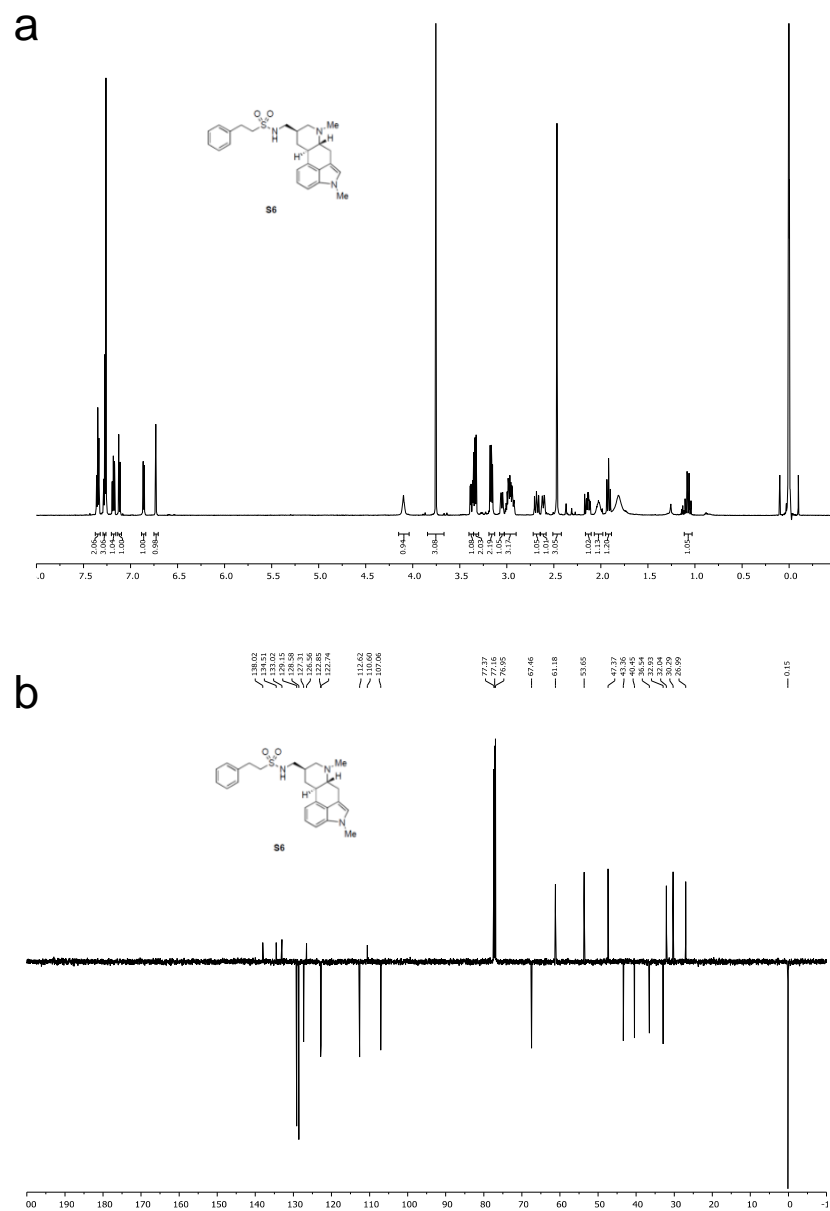

**Supplementary Figure 12.** NMR spectra for *N*-(2-Phenylethylsulfonyl) ergoline derivative (**S6**). **a**  $^1\text{H}$  NMR, 600 MHz,  $\text{CDCl}_3$ . **b**  $^{13}\text{C}$  NMR, 150 MHz,  $\text{CDCl}_3$ . The structure of compound **S6** is shown.

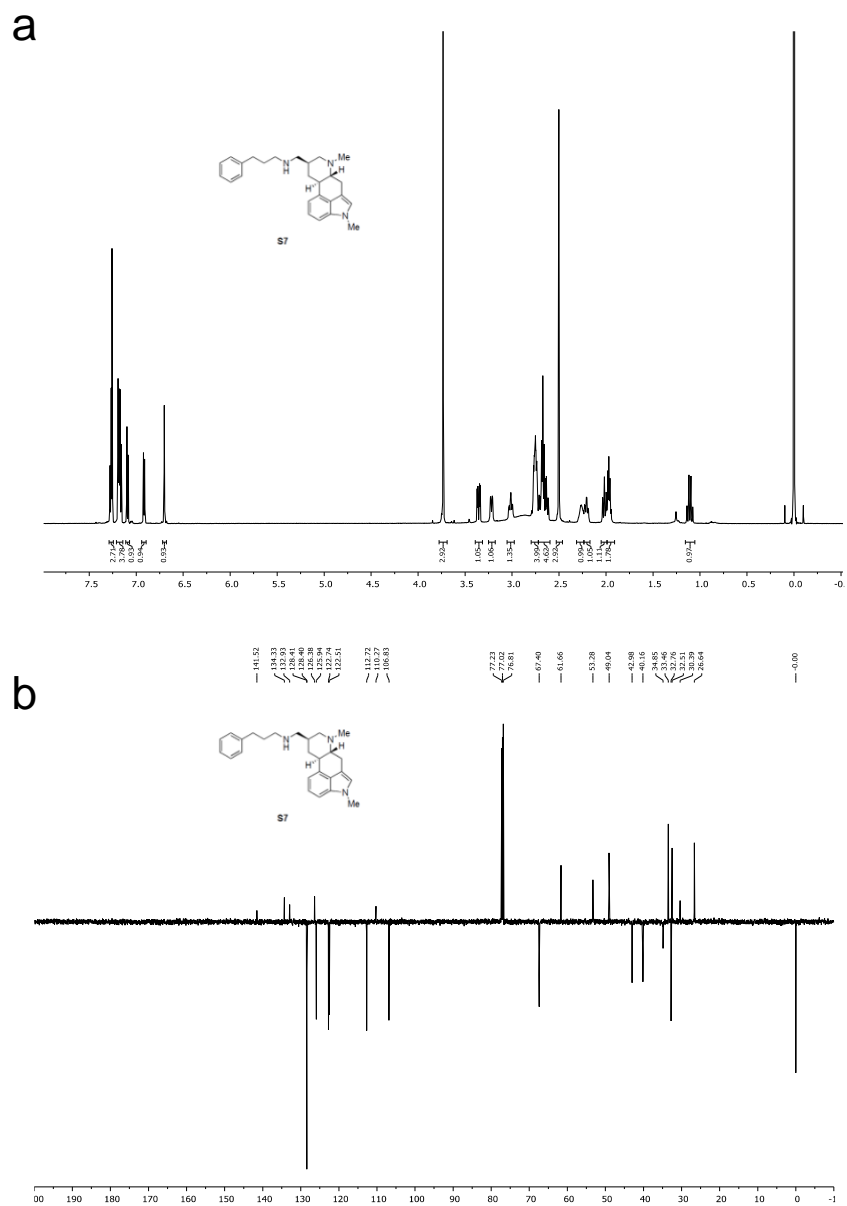

**Supplementary Figure 13.** NMR spectra for *N*-(3-Phenylpropyl) ergoline derivative (**S7**). **a** <sup>1</sup>H NMR, 600 MHz, CDCl<sub>3</sub>. **b** <sup>13</sup>C NMR, 150 MHz, CDCl<sub>3</sub>. The structure of compound **S7** is shown.

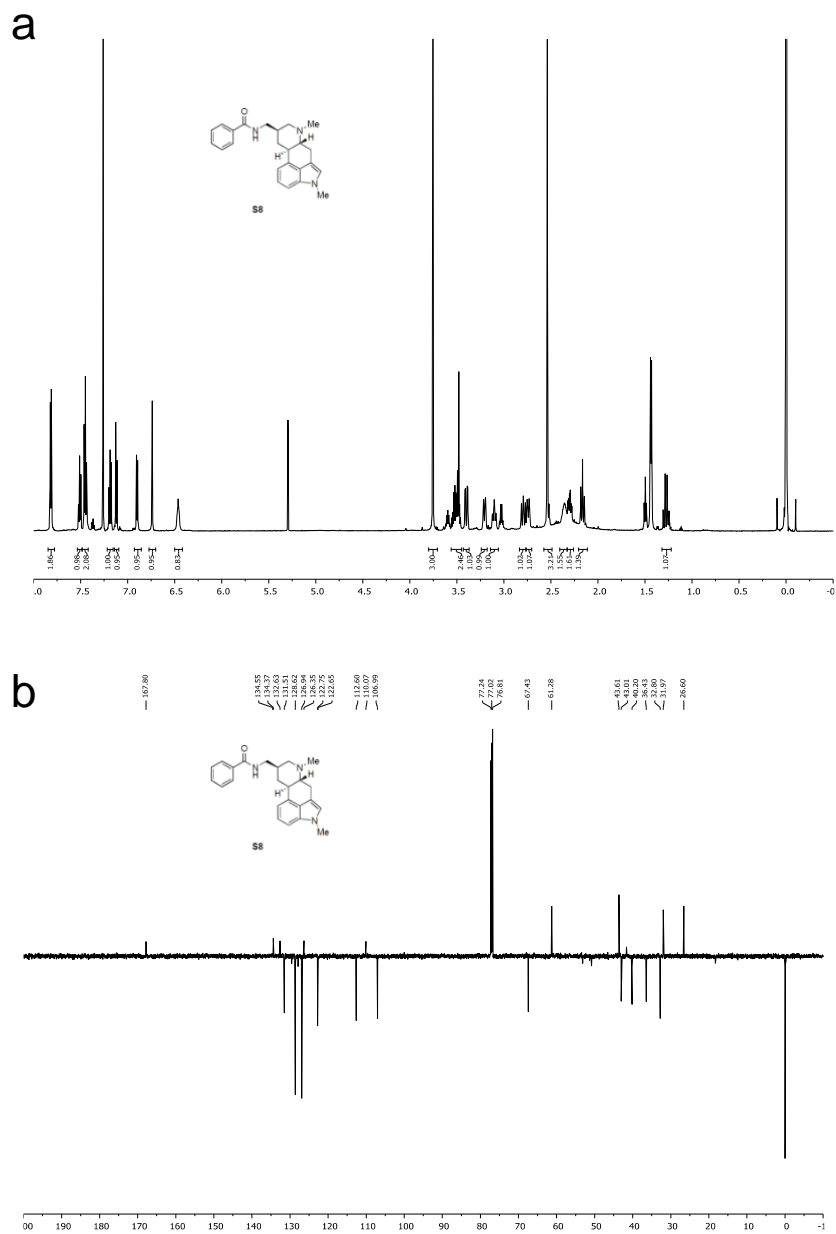

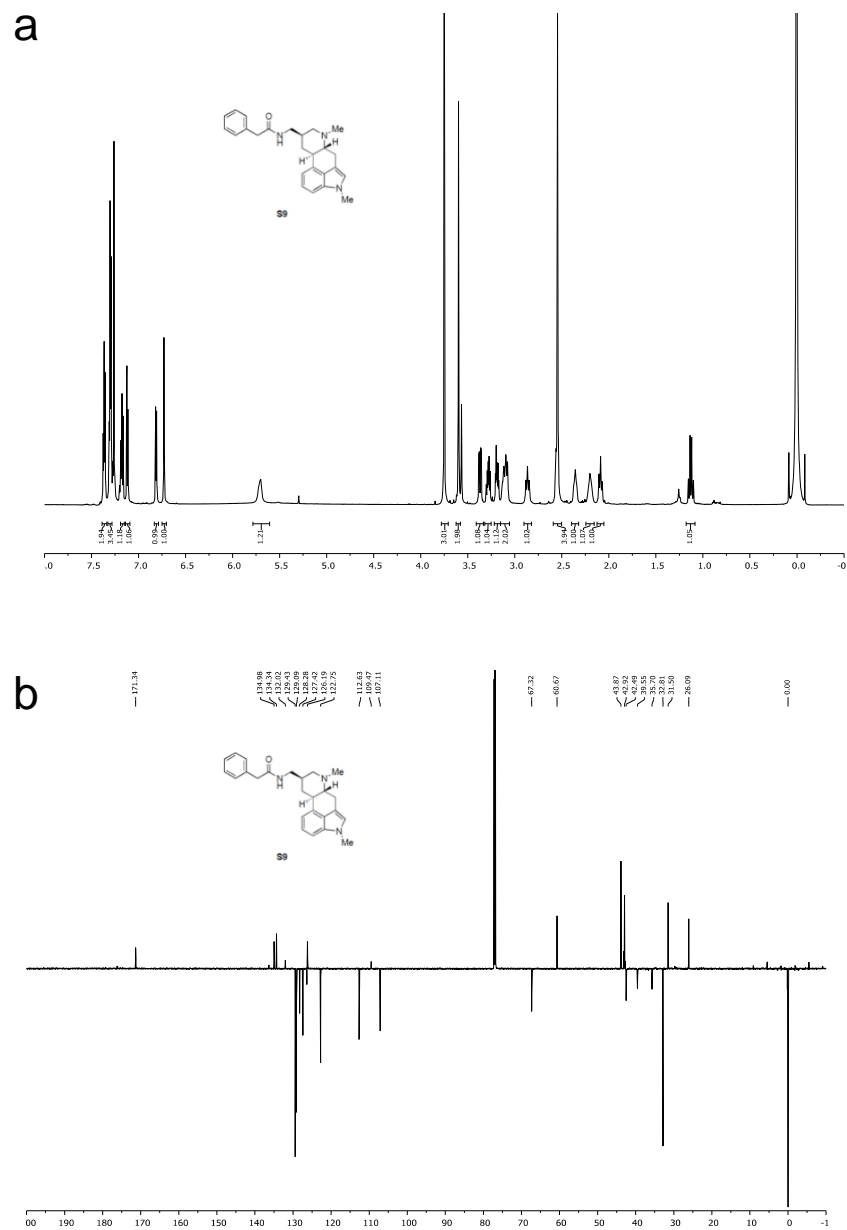

**Supplementary Figure 15.** NMR spectra for *N*-Phenylacetyl ergoline derivative (**S9**). **a** <sup>1</sup>H NMR, 700 MHz, CDCl<sub>3</sub>. **b** <sup>13</sup>C NMR, 175 MHz, CDCl<sub>3</sub>. The structure of compound **S9** is shown.



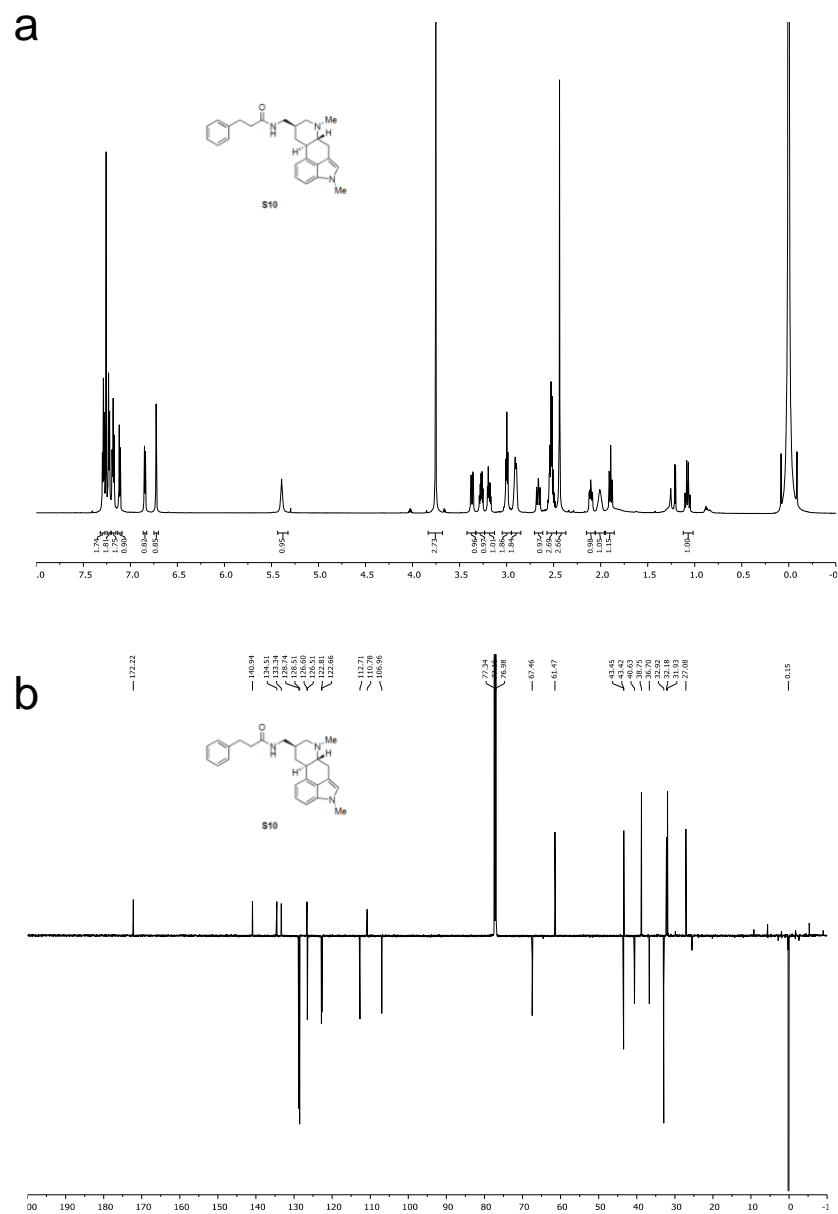

**Supplementary Figure 16.** NMR spectra for *N*-(3-Phenylpropanoyl) ergoline derivative (**S10**). **a**  $^1\text{H}$  NMR, 700 MHz,  $\text{CDCl}_3$ . **b**  $^{13}\text{C}$  NMR, 175 MHz,  $\text{CDCl}_3$ . The structure of compound **S10** is shown.

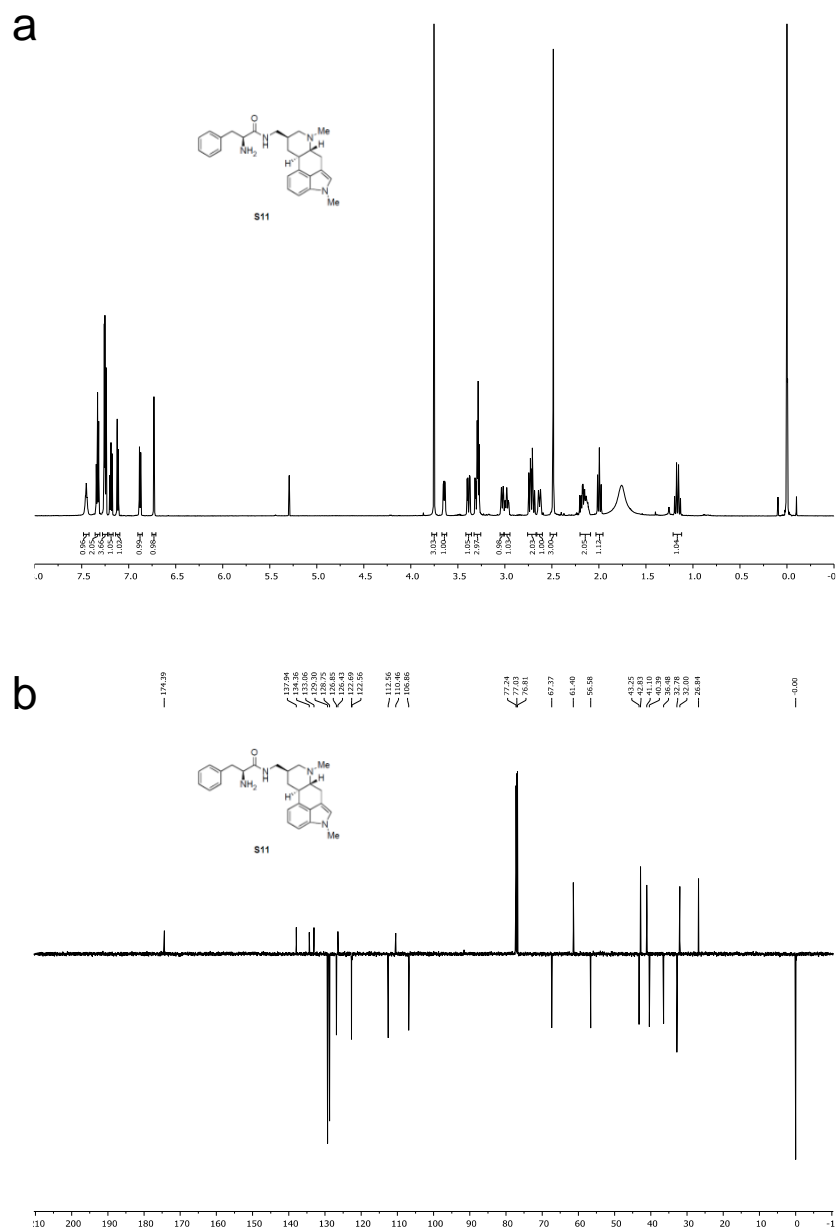

**Supplementary Figure 17.** NMR spectra for *N*-L-Phenylalanyl ergoline derivative (**S11**). **a**  $^1\text{H}$  NMR, 600 MHz,  $\text{CDCl}_3$ . **b**  $^{13}\text{C}$  NMR, 150 MHz,  $\text{CDCl}_3$ . The structure of compound **S11** is shown.

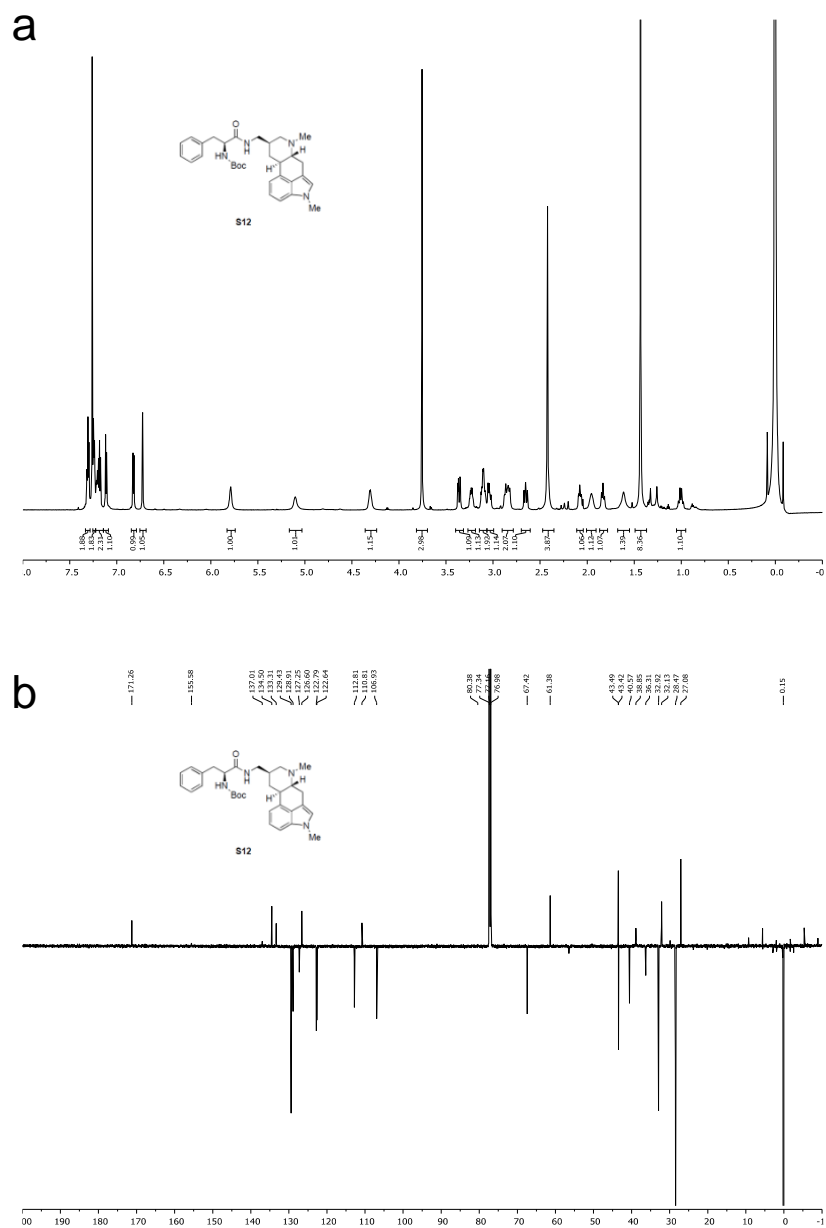

**Supplementary Figure 18.** NMR spectra for *N*-(*N*-Boc-L-Phenylalanyl) ergoline derivative (**S12**). **a**  $^1\text{H}$  NMR, 700 MHz,  $\text{CDCl}_3$ . **b**  $^{13}\text{C}$  NMR, 175 MHz,  $\text{CDCl}_3$ . The structure of compound **S12** is shown.



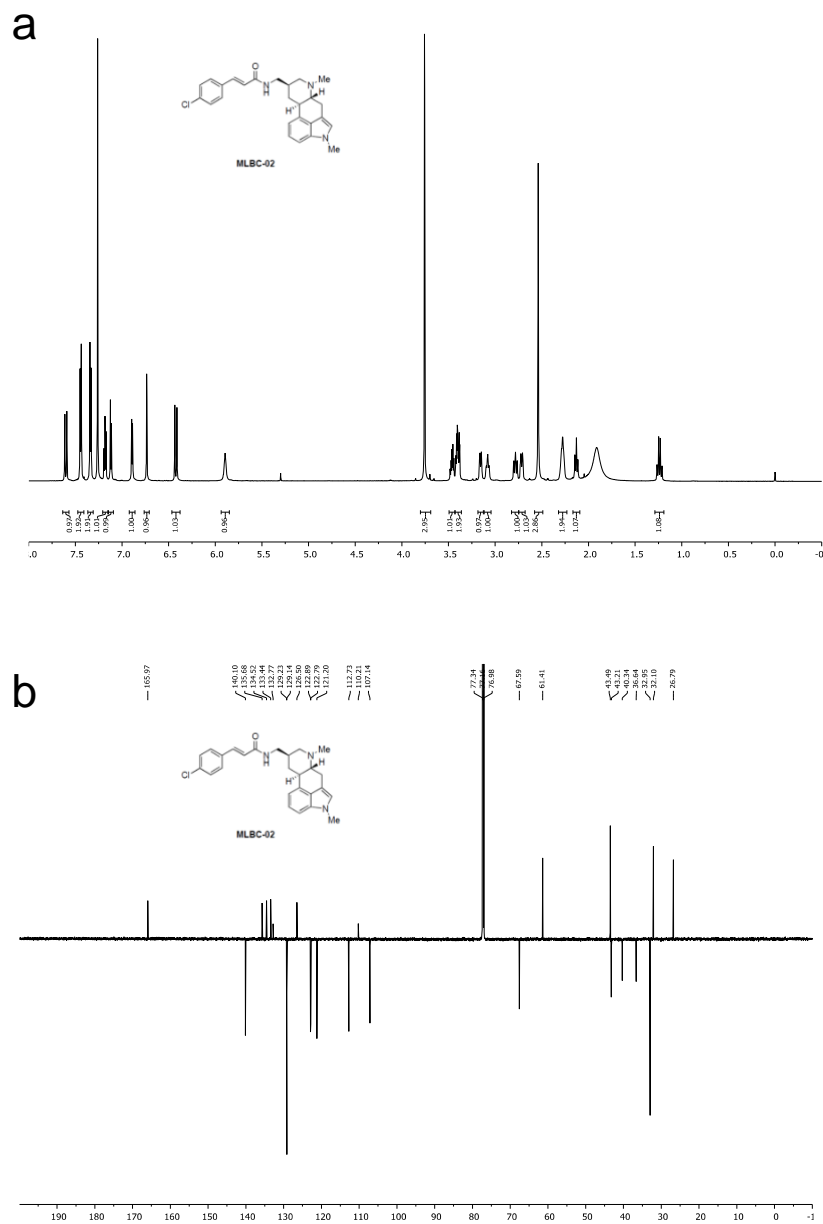

**Supplementary Figure 20.** NMR spectra for *N*-trans-Cinnamoyl derivative (**MLBC-02**). **a**  $^1\text{H}$  NMR, 700 MHz,  $\text{CDCl}_3$ . **b**  $^{13}\text{C}$  NMR, 175 MHz,  $\text{CDCl}_3$ . The structure of compound **MLBC-02** is shown.

**Supplementary Table 1.** Small molecule screening data

| Category          | Parameter                                | Description                                                                                               |
|-------------------|------------------------------------------|-----------------------------------------------------------------------------------------------------------|
| Assay             | Type of assay                            | Cell-based                                                                                                |
|                   | Target                                   | Whole organism <i>Salmonella</i> Typhimurium SL1344                                                       |
|                   | Primary measurement                      | Measurement of optical density at 600 nm, luminescence                                                    |
|                   | Assay protocol                           | Methods section 'High-throughput compound screening'                                                      |
| Library           | Library size                             | 1600                                                                                                      |
|                   | Library composition                      | Synthetic small molecules, off-patent FDA approved molecules, known bioactives                            |
|                   | Source                                   | Microsource                                                                                               |
| Screen            | Format                                   | 96-well plates (Corning), 3 replicates                                                                    |
|                   | Concentration(s) tested                  | 10 $\mu$ M, 0.2% DMSO                                                                                     |
|                   | Plate controls                           | High controls: 0.1% DMSO<br>Low controls: 100 $\mu$ g/mL rifampicin                                       |
|                   | Reagent/compound dispensing system       | Biomek FX liquid handler (Beckman Coulter Inc., Fullerton, CA)                                            |
|                   | Detection instrument and software        | Envision (Perkin Elmer, Waltham, MA)                                                                      |
|                   | Assay validation/QC                      | For LPM screen: average (n=3) Z' score = 0.713, for RAW264.7 data see Figure S1                           |
|                   | Correction factors                       | Optical density readings were background corrected; Luminescence values were normalized to T <sub>0</sub> |
|                   | Normalization                            | Plate and well effects normalized with interquartile mean                                                 |
| Post-HTS analysis | Hit criteria                             | Compounds reducing normalized growth more than 3 $\sigma$ below the                                       |
|                   | Hit rate                                 | LPM, 4.68%; RAW264.7, 6.44%                                                                               |
|                   | Additional assay(s)                      | Dose-response and MIC determination <i>in vitro</i> and in macrophages                                    |
|                   | Confirmation of hit purity and structure | Compounds repurchased and retested                                                                        |

**Supplementary Table 2.** Activity of metergoline and 17 structurally related compounds

| Compound     | Minimum Inhibitory Concentration ( $\mu\text{g mL}^{-1}$ ) |                   |      |                     |      | RAW264.7            |                           |
|--------------|------------------------------------------------------------|-------------------|------|---------------------|------|---------------------|---------------------------|
|              | S. Tm WT                                                   |                   |      | $\Delta\text{tolC}$ | MRSA | Growth <sup>b</sup> | Toxicity (%) <sup>c</sup> |
|              | MHB                                                        | EDTA <sup>a</sup> | LPM  | MHB                 | MHB  |                     |                           |
| Metergoline  | >128                                                       | 64                | 128  | 32                  | 32   | 0.08                | 2.9                       |
| nicergoline  | >128                                                       | 64                | >128 | 128                 | 128  | 0.59                | 7.37                      |
| pergolide    | >128                                                       | >128              | >128 | >128                | >128 | 0.93                | 18.81                     |
| cabergoline  | >128                                                       | >128              | >128 | >128                | >128 | 0.75                | 17.24                     |
| methysergide | >128                                                       | >128              | >128 | >128                | >128 | 1.01                | 15.57                     |
| S1           | >128                                                       | 16                | >128 | >128                | >128 | 0.39                | 6.01                      |
| S2           | >128                                                       | 128               | >128 | >128                | >128 | 0.85                | 6.94                      |
| S3           | >128                                                       | >128              | >128 | 128                 | >128 | 0.23                | 14.02                     |
| S4           | >128                                                       | >128              | >128 | >128                | >128 | 0.84                | 16.54                     |
| S5           | >128                                                       | 128               | >128 | 64                  | 128  | 0.49                | 14.95                     |
| S6           | >128                                                       | 64                | 128  | 64                  | 64   | 0.08                | 19.86                     |
| S7           | >128                                                       | 32                | 64   | 64                  | 16   | 0.58                | 17.78                     |
| S8           | >128                                                       | 128               | >128 | 128                 | >128 | 0.65                | 17.60                     |
| S9           | >128                                                       | 128               | >128 | >128                | >128 | 0.86                | 19.18                     |
| S10          | >128                                                       | >128              | >128 | 128                 | >128 | 0.87                | 20.78                     |
| S11          | >128                                                       | 32                | 64   | >128                | >128 | 0.56                | 12.64                     |
| MLBC-01      | >128                                                       | 32                | 128  | 8                   | 16   | 0.07                | 18.07                     |
| MLBC-02      | >128                                                       | 8                 | 32   | 4                   | 0.5  | 0.08                | 8.9                       |

<sup>a</sup>WT S. Tm was grown in MHB with 10 mM EDTA

<sup>b</sup>Intracellular activity was measured by addition of  $8 \mu\text{g mL}^{-1}$  compound to RAW264.7 macrophages infected with WT S. Tm and is reported as fold-growth inhibition relative to a DMSO-treated control

<sup>c</sup>Toxicity was estimated by lactate dehydrogenase release from uninfected RAW264.7 cells  
All numbers reflect the mean from two (MIC) or three (RAW264.7) experiments.

**Supplementary Table 3.** NMR data for N-acetyl ergoline derivative **S4**<sup>a</sup>

| Position | $\delta$ C, mult     | $\delta$ H, (mult, <i>J</i> in Hz, integration)                                           | COSY                                                                                        | HMBC                                         |
|----------|----------------------|-------------------------------------------------------------------------------------------|---------------------------------------------------------------------------------------------|----------------------------------------------|
| 1'       | 32.9 CH <sub>3</sub> | 3.76 (s, 3H)                                                                              |                                                                                             | C2, C15                                      |
| 2        | 122.7 CH             | 6.73 (s, 1H)                                                                              | H4 <sub>eq</sub> , H4 <sub>ax</sub>                                                         | C1', C3, C15, C16                            |
| 3        | 110.7 C              |                                                                                           |                                                                                             |                                              |
| 4        | 27.1 CH <sub>2</sub> | 2.70 (dd, <i>J</i> = 14.7, 10.6 Hz, 1H, ax)<br>3.38 (dd, <i>J</i> = 14.6, 4.3 Hz, 1H, eq) | H2, H4 <sub>eq</sub> , H5<br>H2, H4 <sub>ax</sub> , H5                                      | C2, C3, C5, C10<br>C2, C3, C5, C10, C16      |
| 5        | 67.5 CH              | 2.16 (td, <i>J</i> = 10.6, 4.3 Hz, 1H)                                                    | H4 <sub>ax</sub> , H4 <sub>eq</sub> , H10                                                   | C4, C6', C7, C9, C10                         |
| 6'       | 43.4 CH <sub>3</sub> | 2.48 (s, 3H)                                                                              |                                                                                             | C4, C5, C7, C8                               |
| 7        | 61.6 CH <sub>2</sub> | 1.99 (dd, <i>J</i> = 11.3, 11.1 Hz, 1H, ax)<br>3.05 (d, <i>J</i> = 11.1 Hz, 1H, eq)       | H7 <sub>eq</sub> , H8<br>H7 <sub>ax</sub> , H8                                              | C5, C6', C9<br>C5, C6', C8, C9               |
| 8        | 36.8 CH              | 2.07–2.13 (m, 1H)                                                                         | H8'A, H8'B,<br>H7 <sub>ax</sub> , H7 <sub>eq</sub> ,<br>H9 <sub>ax</sub> , H9 <sub>eq</sub> | C7                                           |
| 8'       | 43.5 CH <sub>2</sub> | 3.27 (m, <i>J</i> = 13.5, 6.0 Hz, 1H, A)<br>3.29 (m, <i>J</i> = 13.5, 6.8 Hz, 1H, B)      | H8, H8'B                                                                                    | C7, C8, C9, C18                              |
| 9        | 32.2 CH <sub>2</sub> | 1.17 (q, <i>J</i> = 12.4 Hz, 1H, ax)<br>2.65 (m, 1H, eq)                                  | H8, H9 <sub>eq</sub> , H10<br>H8, H9 <sub>ax</sub> , H10                                    | C5, C7, C8, C8', C10, C11<br>C5, C7, C8, C10 |
| 10       | 40.4 CH              | 2.97 (ddd, <i>J</i> = 12.4, 10.6, 3.4 Hz)                                                 | H5, H9 <sub>ax</sub> , H9 <sub>ax</sub>                                                     | C5, C9, C11                                  |
| 11       | 133.3 C              |                                                                                           |                                                                                             |                                              |
| 12       | 112.7 CH             | 6.89 (d, <i>J</i> = 7.1 Hz, 1H)                                                           | H13                                                                                         | C3, C10, C13, C14, C15, C16                  |
| 13       | 122.8 CH             | 7.18 (dd, <i>J</i> = 7.1, 8.1 Hz, 1H)                                                     | H12, H14                                                                                    | C11, C12, C15, C16                           |
| 14       | 107.0 CH             | 7.11 (d, <i>J</i> = 8.1 Hz, 1H)                                                           | H13                                                                                         | C11, C12, C16                                |
| 15       | 134.5 C              |                                                                                           |                                                                                             |                                              |
| 16       | 126.6 C              |                                                                                           |                                                                                             |                                              |
| 17       |                      | 5.57 (brs, 1H)                                                                            | H8'A, H8'B                                                                                  | C18                                          |
| 18       | 170.3 C              |                                                                                           |                                                                                             |                                              |
| 19       | 23.6 CH <sub>3</sub> | 2.03 (s, 3H)                                                                              |                                                                                             | C18                                          |

<sup>a</sup> <sup>1</sup>H NMR (700 MHz) and <sup>13</sup>C NMR (175 MHz) experiments were recorded in CDCl<sub>3</sub> at 23 °C. Positional assignments are based on HSQC and HMBC correlation experiments. Stereochemical assignments were deduced from coupling constants.



## Supplementary Methods

### Synthetic Experimental Procedures: General

Chemical shifts in  $^1\text{H}$  NMR and  $^{13}\text{C}$  NMR spectra are reported in parts per million (ppm) relative to tetramethylsilane (TMS), with calibration of the residual solvent peaks according to values reported by Gottlieb et al. (chloroform:  $\delta_{\text{H}}$  7.26,  $\delta_{\text{C}}$  77.16; acetone:  $\delta_{\text{H}}$  2.05,  $\delta_{\text{C}}$  29.84, 206.26; methanol:  $\delta_{\text{H}}$  3.31,  $\delta_{\text{C}}$  49.00; DMSO:  $\delta_{\text{H}}$  2.50,  $\delta_{\text{C}}$  39.52; acetonitrile:  $\delta_{\text{H}}$  1.94,  $\delta_{\text{C}}$  1.32, 118.26)<sup>1</sup>. When peak multiplicities are given, the following abbreviations are used: s, singlet; d, doublet; t, triplet; q, quartet; sept., septet; dd, doublet of doublets; m, multiplet; br, broad; app., apparent; *gem*, geminal.  $^1\text{H}$  NMR spectra were acquired at 600 or 700 MHz with a default digital resolution (Brüker parameter: FIDRES) of 0.18 and 0.15 Hz/point, respectively. Coupling constants reported herein therefore have uncertainties of  $\pm 0.4$  Hz and  $\pm 0.3$  Hz, respectively. All assignments of protons and carbons relied on data from 2-dimensional NMR experiments including COSY, HMQC, and HMBC. The  $^{13}\text{C}$  NMR (DEPTq) spectra provided herein show CH and  $\text{CH}_3$  carbon signals below the baseline and C and  $\text{CH}_2$  carbons above the baseline. Melting points (mp) are uncorrected. Reactions were carried out at room temperature (rt) if temperature is not specified. An automated flash chromatography system (Teledyne CombiFlash Rf 200) was used for the purification of compounds on silica gel (either 40–60  $\mu\text{M}$  or 20–40  $\mu\text{M}$  particle size).

### General Procedure A

To a solution of amine **S1** (1.0 equiv), EDC·HCl (1.2 equiv), HOBt (1.2 equiv), and a carboxylic acid (1.2 equiv) in  $\text{CH}_2\text{Cl}_2$  (0.02 M) was added *i*-Pr<sub>2</sub>NEt (3 equiv). The reaction mixture was stirred at rt for 3–16 h and the progress of the reaction followed by thin-layer chromatography (TLC). Upon completion, the reaction mixture was diluted with  $\text{CH}_2\text{Cl}_2$ , washed with saturated aqueous  $\text{Na}_2\text{CO}_3$ , dried over  $\text{Na}_2\text{SO}_4$ , and concentrated under reduced pressure. Products were purified by flash chromatography (MeOH/ $\text{CH}_2\text{Cl}_2$ ) on silica gel.

## Aminomethyl ergoline (S1)

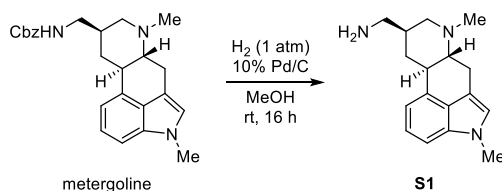

To a stirring solution of metergoline (1.00 g, 2.48 mmol) in MeOH (75 mL) was added 10% Pd/C (50 mg). The solution was degassed by stirring under vacuum for approximately 30–60 seconds, followed by back-filling with argon via balloon. After repeating the process 10 times, the flask was back-filled with H<sub>2</sub> gas from a balloon and the reaction stirred overnight at rt. After 14 h, the reaction vessel was purged of H<sub>2</sub> with argon and TLC analysis indicated the starting material was consumed. The reaction mixture was then filtered through a pad of Celite and the resulting yellow solution concentrated under reduced pressure to provide the primary amine as a viscous amber oil that was used in following reactions without further purification. The crude oil was diluted with CH<sub>2</sub>Cl<sub>2</sub>, aliquotted into reaction vials, and concentrated under reduced pressure. A small amount of the crude amine **S1** solidified after concentrating from CH<sub>2</sub>Cl<sub>2</sub> into an amorphous solid. Mp: 135–138 °C (lit. 151–153 °C)<sup>2</sup>. *R*<sub>f</sub> = 0.03 (10% MeOH/CH<sub>2</sub>Cl<sub>2</sub>). <sup>1</sup>H NMR (700 MHz, CDCl<sub>3</sub>): 7.19 (dd, *J* = 7.1, 8.1 Hz, 1H), 7.11 (d, *J* = 8.1 Hz, 1H), 6.93 (d, *J* = 7.1 Hz, 1H), 6.72 (s, 1H), 3.76 (s, 3H), 3.39 (dd, *J* = 14.6, 4.2 Hz, 1H), 3.12 (d, *J* = 9.6 Hz, 1H), 2.97 (m, 1H), 2.75–2.65 (m, 4H), 2.48 (s, 3H), 2.14 (td, *J* = 10.6, 4.2 Hz, 1H), 2.00–1.90 (m, 2H), 1.10 (q, *J* = 12.1 Hz, 1H). <sup>13</sup>C NMR (CDCl<sub>3</sub>): 27.2, 32.3, 32.9, 39.5, 40.7, 43.6, 46.8, 62.0, 67.7, 106.9, 110.9, 112.7, 122.7, 122.6, 126.7, 133.8, 134.5. LCMS (ESI) *m/z*: 270.1965 calculated for C<sub>17</sub>H<sub>24</sub>N<sub>3</sub><sup>+</sup> ([M + H]<sup>+</sup>); 270.1962 observed.

## Ethyl carbamate ergoline derivative (S2)

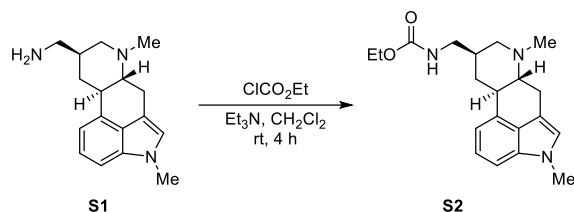

Et<sub>3</sub>N (31  $\mu$ L, 0.22 mmol) was added to a solution of ethyl chloroformate (31 mg, 0.14 mmol) and amine **S1** (30 mg, 0.11 mmol) in CH<sub>2</sub>Cl<sub>2</sub> (5 mL) and the reaction stirred for 6 h at rt. TLC analysis at 4 h indicated that the reaction was complete, and the solution was diluted with CH<sub>2</sub>Cl<sub>2</sub> (25 mL), washed with saturated Na<sub>2</sub>CO<sub>3</sub> (20 mL), dried over Na<sub>2</sub>SO<sub>4</sub>, and concentrated under reduced pressure. Flash chromatography (0 $\rightarrow$ 20% MeOH/CH<sub>2</sub>Cl<sub>2</sub>) provided the ethyl carbamate **S2** as a yellow glassy solid (21 mg, 0.062 mmol, 56%). *R*<sub>f</sub> = 0.28 (5% MeOH/CH<sub>2</sub>Cl<sub>2</sub>). <sup>1</sup>H NMR (700 MHz, CDCl<sub>3</sub>):  $\delta$  7.18 (dd, *J* = 7.0, 8.1 Hz, 1H), 7.11 (d, *J* = 8.1 Hz, 1H), 6.90 (d, *J* = 7.0 Hz, 1H), 6.73 (s, 1H), 4.75 (brs, 1H), 4.17–4.10 (m, 2H), 3.75 (s, 3H), 3.38 (dd, *J* = 14.5, 4.2 Hz, 1H), 3.23–3.15 (m, 2H), 3.07 (d, *J* = 10.6 Hz, 1H), 3.00–2.95 (m, 1H), 2.75–2.65 (m, 2H), 2.49 (s, 3H), 2.20–2.10 (m, 2H), 2.00 (app t, *J* = 10.6 Hz, 1H), 1.26 (t, *J* = 6.8 Hz, 3H), 1.16 (app q, *J* = 12.2 Hz, 1H). <sup>13</sup>C NMR (125 MHz, CDCl<sub>3</sub>):  $\delta$  156.8, 134.4, 133.2, 126.4, 122.7, 122.5, 112.6, 110.6, 106.8, 67.4, 61.3, 60.9, 44.9, 43.3, 40.4, 36.7, 32.8, 31.9, 26.9, 14.7. LCMS (ESI) *m/z*: 342.2176 calculated for C<sub>20</sub>H<sub>28</sub>N<sub>3</sub>O<sub>2</sub><sup>+</sup> ([M + H]<sup>+</sup>); 342.2203 observed.

## *N*-Boc ergoline derivative (S3)

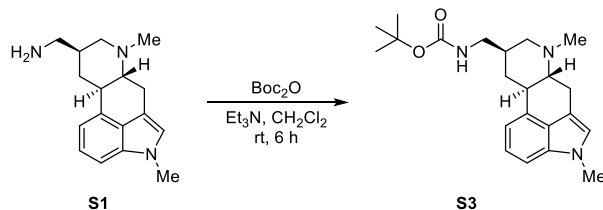

Et<sub>3</sub>N (31  $\mu$ L, 0.22 mmol) was added to a solution of Boc<sub>2</sub>O (31 mg, 0.14 mmol) and amine **S1** (30 mg, 0.11 mmol) in CH<sub>2</sub>Cl<sub>2</sub> (5 mL) and the reaction stirred for 6 h at rt. TLC analysis at 6 h indicated that the reaction was complete, and the solution was diluted with CH<sub>2</sub>Cl<sub>2</sub> (25 mL), washed with saturated Na<sub>2</sub>CO<sub>3</sub> (20 mL), dried over Na<sub>2</sub>SO<sub>4</sub>, and concentrated under reduced

pressure. Flash chromatography (0→20% MeOH/CH<sub>2</sub>Cl<sub>2</sub>) provided the *t*-butyl carbamate **S3** as a viscous oily solid (32 mg, 0.087 mmol, 86%). *R*<sub>f</sub> = 0.26 (5% MeOH/CH<sub>2</sub>Cl<sub>2</sub>). <sup>1</sup>H NMR (700 MHz, CDCl<sub>3</sub>): δ 7.18 (dd, *J* = 7.1, 8.1 Hz, 1H), 7.11 (d, *J* = 8.1 Hz, 1H), 6.90 (d, *J* = 7.1 Hz, 1H), 6.73 (s, 1H), 4.70–4.59 (brs, 1H), 3.75 (s, 3H), 3.38 (dd, *J* = 14.5, 4.2 Hz, 1H), 3.23–3.16 (m, 1H), 3.12–3.02 (m, 2H), 2.95 (m, 1H), 2.72–2.64 (m, 2H), 2.47 (s, 3H), 2.16–2.11 (m, 1H) 2.11–2.06 (m, 1H), 1.96 (app t, *J* = 10.9 Hz, 1H), 1.46 (s, 9H), 1.14 (app q, *J* = 12.2 Hz, 1H). <sup>13</sup>C NMR (175 MHz, CDCl<sub>3</sub>): δ 156.1, 134.4, 133.3, 126.5, 122.7, 122.5, 112.5, 110.7, 106.8, 79.3, 67.4, 61.5, 44.6, 43.4, 40.5, 36.9, 32.8, 32.0, 28.4 (3C), 27.0. LCMS (ESI) *m/z*: 370.2489 calculated for C<sub>22</sub>H<sub>32</sub>N<sub>3</sub>O<sub>2</sub><sup>+</sup> ([M + H]<sup>+</sup>); 370.2526 observed.

### ***N*-Acetyl ergoline derivative (S4)**

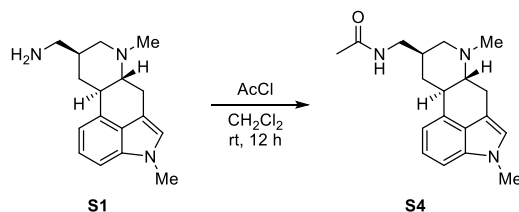

In a modification of a known procedure,<sup>2</sup> acetyl chloride (16 μL, 0.22 mmol) was added to a solution of amine **S1** (30 mg, 0.11 mmol) in CH<sub>2</sub>Cl<sub>2</sub> (5 mL) and stirred overnight at rt. After 12 h, the reaction mixture was diluted with CH<sub>2</sub>Cl<sub>2</sub> (25 mL), washed with saturated Na<sub>2</sub>CO<sub>3</sub> (20 mL), dried over Na<sub>2</sub>SO<sub>4</sub>, and concentrated under reduced pressure to give a yellow oil that solidified under vacuum. Flash chromatography (0→20% MeOH/CH<sub>2</sub>Cl<sub>2</sub>) provided acetamide **S4** (30 mg, 0.10 mmol, 88%) as an amorphous yellow solid. *R*<sub>f</sub> = 0.08 (5% MeOH/CH<sub>2</sub>Cl<sub>2</sub>). Mp: 191–194 °C (lit. 191–193 °C)<sup>2</sup>. <sup>1</sup>H NMR (700 MHz, CDCl<sub>3</sub>): 7.18 (dd, *J* = 7.1, 8.2 Hz, 1H), 7.11 (d, *J* = 8.2 Hz, 1H), 6.89 (d, *J* = 7.1 Hz, 1H), 6.73 (s, 1H), 5.59 (brs, 1H), 3.76 (s, 3H), 3.38 (dd, *J* = 14.6, 4.3 Hz, 1H), 3.29 (A of ABX, *J* = 13.5, 6.8 Hz, 1H), 3.27 (B of ABX, *J* = 13.5, 6.0 Hz, 1H), 3.05 (d, *J* = 11.2 Hz, 1H), 2.97 (ddd, *J* = 12.3, 10.6, 3.4 Hz, 1H), 2.65–2.72 (m, 2H), 2.48 (s, 3H), 2.16 (td, *J* = 10.6 Hz, *J* = 4.3 Hz, 1H), 2.07–2.15 (m, 1H), 2.03 (s, 3H), 1.99 (dd, *J* = 11.3, 11.1 Hz, 1H), 1.17 (q, *J* = 12.3 Hz, 1H). <sup>13</sup>C NMR (150 MHz, CDCl<sub>3</sub>): 170.2, 134.4, 133.1, 126.4, 122.7, 122.6, 112.5, 110.5, 106.9, 67.4, 61.4, 43.4, 43.3, 40.5, 36.6, 32.8, 32.1, 26.9, 23.4. LCMS (ESI) *m/z*: 312.2070 calculated for C<sub>19</sub>H<sub>26</sub>N<sub>3</sub>O<sup>+</sup> ([M + H]<sup>+</sup>); 312.2076 observed.

### *N*-(*N*-Benzyl) urea derivative (**S5**)

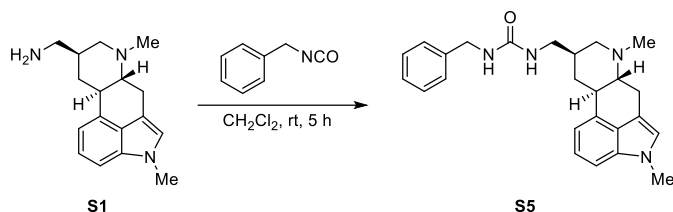

Benzyl isocyanate (15  $\mu$ L, 0.12 mmol) was added to a solution of amine **S1** (30 mg, 0.11 mmol) in CH<sub>2</sub>Cl<sub>2</sub> (5 mL) and stirred at rt for 5 h. The reaction mixture was diluted with CH<sub>2</sub>Cl<sub>2</sub> (25 mL), washed with saturated Na<sub>2</sub>CO<sub>3</sub> (20 mL), dried over Na<sub>2</sub>SO<sub>4</sub>, and concentrated under reduced pressure. Flash chromatography (0 $\rightarrow$ 10% MeOH/CH<sub>2</sub>Cl<sub>2</sub>) provided the *N*-benzyl urea derivative **S5** as a beige solid (28 mg, 0.069 mmol, 63%). *R*<sub>f</sub> = 0.12 (5% MeOH/CH<sub>2</sub>Cl<sub>2</sub>). Mp: sintered at 200–205  $^{\circ}$ C; melted at 265–270  $^{\circ}$ C (dec). <sup>1</sup>H NMR (700 MHz, CDCl<sub>3</sub>):  $\delta$  7.32–7.34 (t, 3H), 7.23–7.26 (m, 2H), 7.18 (dd, *J* = 7.1, 8.1 Hz, 2H), 7.11 (d, *J* = 8.1 Hz, 1H), 6.86 (d, *J* = 7.1 Hz, 1H), 6.72 (s, 1H), 4.87 (brs, 1H), 4.61 (brs, 1H), 4.41 (A or ABX, *J* = 15.0, 5.9 Hz, 1H), 4.37 (B or ABX, *J* = 15.0, 5.8 Hz, 1H), 3.75 (s, 3H), 3.37 (dd, *J* = 14.5, 4.2 Hz, 1H), 3.20 (m, 1H), 3.06 (brd, *J* = 10.6 Hz, 1H), 3.02–2.98 (m, 1H), 2.73 (app t, *J* = 12.4, Hz, 1H), 2.62 (d, *J* = 12.0 Hz, 1H), 2.48 (s, 3H), 2.20 (td, *J* = 10.6 Hz, *J* = 4.0 Hz, 1H), 2.15–2.05 (m, 1H), 2.00 (t, *J* = 11.4 Hz, 1H), 1.12 (q, *J* = 12.3 Hz, 1H). <sup>13</sup>C NMR (175 MHz, CDCl<sub>3</sub>):  $\delta$  158.2, 139.2, 134.4, 132.9, 128.7 (2C), 127.5 (2C), 127.4, 126.4, 122.7, 122.6, 112.6, 110.2, 106.9, 67.4, 31.3, 44.7, 44.3, 43.1, 40.2, 36.8, 32.8, 31.9, 26.7. LCMS (ESI) *m/z*: 403.2492 calculated for C<sub>25</sub>H<sub>31</sub>N<sub>4</sub>O<sup>+</sup> ([M + H]<sup>+</sup>); 403.2565 observed.

### *N*-(2-Phenylethylsulfonyl) ergoline derivative (**S6**)

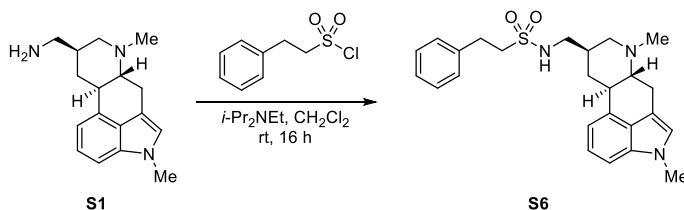

To a solution of amine **S1** (30 mg, 0.11 mmol) and 2-phenylethanesulfonyl chloride (26 mg, 0.13 mmol) in CH<sub>2</sub>Cl<sub>2</sub> (5 mL) was added *i*-Pr<sub>2</sub>NEt (58  $\mu$ L, 0.33 mmol). After stirring the reaction mixture at rt for 5 h, it was diluted with CH<sub>2</sub>Cl<sub>2</sub> (25 mL), washed with saturated Na<sub>2</sub>CO<sub>3</sub> (20 mL),

dried over Na<sub>2</sub>SO<sub>4</sub>, and concentrated under reduced pressure to give a yellow oily solid. Flash chromatography (0→10% MeOH/CH<sub>2</sub>Cl<sub>2</sub>) provided sulfonamide **S6** as a pale yellow amorphous solid (27 mg, 0.062 mmol, 56%). *R*<sub>f</sub> = 0.24 (5% MeOH/CH<sub>2</sub>Cl<sub>2</sub>). <sup>1</sup>H NMR (600 MHz, CDCl<sub>3</sub>): 7.35 (t, *J* = 7.5 Hz, 2H), 7.29–7.25 (m, 3H), 7.18 (dd, *J* = 8.2, 7.1 Hz, 1H), 7.12 (d, *J* = 8.2 Hz, 1H), 6.86 (d, *J* = 7.1 Hz, 1H), 6.73 (s, 1H), 4.10 (brs, 1H), 3.75 (s, 3H), 3.37 (dd, *J* = 14.7, 4.4 Hz, 1H), 3.35–3.31 (m, 2H), 3.18–3.14 (m, 1H), 3.05 (d, *J* = 10.6 Hz, 1H), 3.02–2.90 (m, 3H), 2.72–2.66 (m, 1H), 2.64–2.58 (m, 1H), 2.47 (s, 3H), 2.13 (td, *J* = 10.8 Hz, *J* = 4.3 Hz, 1H), 1.92 (t, *J* = 11.3 Hz, 1H), 1.08 (q, *J* = 12.3 Hz, 1H). <sup>13</sup>C NMR (150 MHz, CDCl<sub>3</sub>): 138.0, 134.5, 133.0, 129.2 (2C), 128.6 (2C), 127.3, 126.6, 122.9, 122.7, 112.6, 110.6, 107.0, 67.5, 61.2, 53.7, 47.4, 43.4, 40.5, 36.5, 32.9, 32.0, 30.3, 27.0. LCMS (ESI) *m/z*: 438.2210 calculated for C<sub>25</sub>H<sub>32</sub>N<sub>3</sub>O<sub>2</sub>S<sup>+</sup> ([M + H]<sup>+</sup>); 438.2301 observed.

### ***N*-(3-Phenylpropyl) ergoline derivative (S7)**

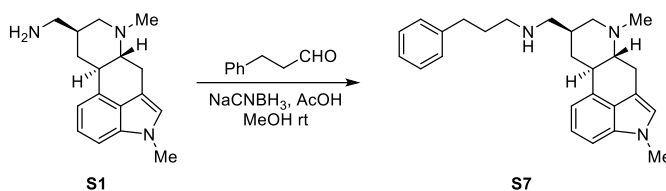

Amine **S1** (36 mg, 0.13 mmol) and 3-phenylpropanal (20 mg, 0.15 mmol) were combined and stirred with Na<sub>2</sub>SO<sub>4</sub> (50 mg) in MeOH (5 mL) at rt. After stirring for 15 min, NaCNBH<sub>3</sub> (51 mg, 0.82 mmol) and AcOH (50 μL) were added and the solution stirred at rt for 2 h. The reaction mixture was diluted with CH<sub>2</sub>Cl<sub>2</sub> (50 mL), washed with saturated Na<sub>2</sub>CO<sub>3</sub> (30 mL), dried over Na<sub>2</sub>SO<sub>4</sub>, and concentrated under reduced pressure. Flash chromatography (0→20% MeCN/H<sub>2</sub>O) provided amine **S7** as an off-white amorphous solid (32 mg, 0.083 mmol, 63%). *R*<sub>f</sub> = 0.10 (10% MeOH/CH<sub>2</sub>Cl<sub>2</sub>). <sup>1</sup>H NMR (600 MHz, CDCl<sub>3</sub>): 7.28–7.24 (m, 2H), 7.20–7.15 (m, 4H), 7.09 (d, *J* = 8.2 Hz, 1H), 6.92 (d, *J* = 7.1 Hz, 1H), 6.70 (s, 1H), 3.73 (s, 3H), 3.36 (dd, *J* = 14.6, 4.3 Hz, 1H), 3.22 (brd, *J* = 10.4 Hz, 1H), 3.01 (brt, *J* = 10.4, 3.5 Hz, 1H), 2.78–2.73 (m, 4H), 2.72–2.61 (m, 5H), 2.50 (s, 3H), 2.30–2.22 (m, 1H), 2.21 (td, *J* = 10.7, 4.2 Hz, 1H), 2.02 (t, *J* = 11.7 Hz, 1H), 1.99–1.97 (m, 2H), 1.11 (q, *J* = 12.3 Hz, 1H). <sup>13</sup>C NMR (150 MHz, CDCl<sub>3</sub>): 141.5, 134.3, 133.0, 128.4 (4C), 126.4, 125.9, 122.7, 122.5, 112.7, 110.3, 106.8, 67.4, 61.7, 53.3, 49.0, 43.0, 40.2, 34.9, 33.5, 32.8, 32.5, 30.4, 26.6. LCMS (ESI) *m/z*: 388.2747 calculated for

C<sub>24</sub>H<sub>34</sub>N<sub>3</sub><sup>+</sup> ([M + H]<sup>+</sup>); 388.2785 observed.

### ***N*-Benzoyl ergoline derivative (S8)**

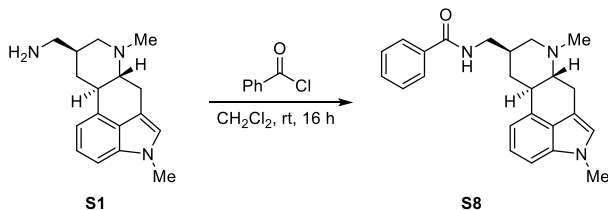

Benzoyl chloride (20 mg, 0.15 mmol) was added to a solution of the amine **S1** (30 mg, 0.11 mmol) in CH<sub>2</sub>Cl<sub>2</sub> (5 mL) and stirred overnight at rt. After 16 h, the reaction mixture was diluted with CH<sub>2</sub>Cl<sub>2</sub> (25 mL), washed with saturated Na<sub>2</sub>CO<sub>3</sub> (20 mL), dried over Na<sub>2</sub>SO<sub>4</sub>, and concentrated under reduced pressure. Flash chromatography (0→20% MeOH/CH<sub>2</sub>Cl<sub>2</sub>) provided amide **S8** as an amber oily solid (32 mg, 0.085 mmol, 77%). *R*<sub>f</sub> = 0.20 (5% MeOH/CH<sub>2</sub>Cl<sub>2</sub>). <sup>1</sup>H NMR (700 MHz, CDCl<sub>3</sub>): 7.82 (d, *J* = 7.3 Hz, 2H), 7.51 (t, *J* = 7.4 Hz, 1H), 7.45 (dd, *J* = 7.3, 7.4 Hz, 2H), 7.19 (dd, *J* = 7.1, 8.2 Hz, 1H), 7.13 (d, *J* = 8.2 Hz, 1H), 6.90 (d, *J* = 7.1 Hz, 1H), 6.74 (s, 1H), 6.50–6.44 (brs, 1H), 3.75 (s, 3H), 3.55–3.45 (m, 2H), 3.40 (dd, *J* = 14.6, 4.3 Hz, 1H), 3.21 (d, *J* = 12.4 Hz, 1H), 3.14–3.07 (m, 1H), 2.85–2.75 (m, 1H), 2.74 (d, *J* = 12.6 Hz, 1H), 2.54 (s, 3H), 2.39–2.33 (m, 1H), 2.30 (td, *J* = 4.4, 10.8 Hz, 1H), 2.16 (t, *J* = 11.4 Hz, 1H), 1.31 (q, *J* = 12.4 Hz, 1H). <sup>13</sup>C NMR (150 MHz, CDCl<sub>3</sub>): 167.8, 134.6, 134.4, 132.6, 131.5, 128.6 (2C), 126.9 (2C), 126.4, 122.8, 122.7, 112.6, 110.1, 107.0, 67.4, 61.3, 43.6, 43.0, 40.2, 36.4, 32.8, 32.0, 26.6. LCMS (ESI) *m/z*: 374.2227 calculated for C<sub>24</sub>H<sub>28</sub>N<sub>3</sub>O<sup>+</sup> ([M + H]<sup>+</sup>); 374.2296 observed.

### ***N*-Phenylacetyl ergoline derivative (S9)**

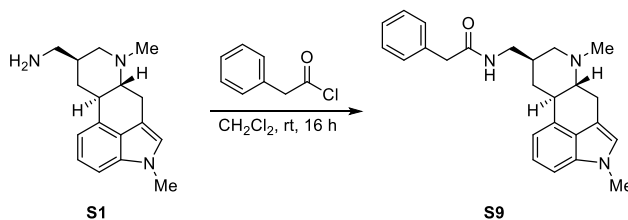

Phenylacetyl chloride (22 μL, 0.17 mmol) was added to a solution of the amine **S1** (30 mg, 0.11 mmol) in CH<sub>2</sub>Cl<sub>2</sub> (5 mL) and stirred overnight at rt. After 16 h, the reaction mixture was diluted with CH<sub>2</sub>Cl<sub>2</sub> (25 mL), washed with saturated Na<sub>2</sub>CO<sub>3</sub> (20 mL), dried over Na<sub>2</sub>SO<sub>4</sub>, and

concentrated under reduced pressure. Flash chromatography (0→20% MeOH/CH<sub>2</sub>Cl<sub>2</sub>) provided amide **S9** as an amorphous pale yellow solid (20 mg, 0.050 mmol, 45%). *R*<sub>f</sub> = 0.22 (5% MeOH/CH<sub>2</sub>Cl<sub>2</sub>). <sup>1</sup>H NMR (700 MHz, CDCl<sub>3</sub>): 7.38–7.36 (t, *J* = 7.5 Hz, 2H), 7.34–7.28 (m, 3H), 7.18 (dd, *J* = 7.1, 8.2 Hz, 1H), 7.12 (d, *J* = 8.2 Hz, 1H), 6.81 (d, *J* = 7.1 Hz, 1H), 6.73 (s, 1H), 5.75–5.68 (brs, 1H), 3.75 (s, 3H), 3.60 (s, 2H), 3.37 (dd, *J* = 14.5, 4.3 Hz, 1H), 3.31–3.26 (m, 1H), 3.22–3.17 (m, 1H), 3.14–3.04 (m, 2H), 2.86 (app t, *J* = 12.7 Hz, 1H), 2.57–2.53 (m, 1H), 2.55 (s, 3H), 2.38–2.33 (m, 1H), 2.24–2.16 (m, 1H), 2.09 (t, *J* = 11.4 Hz, 1H), 1.13 (q, *J* = 12.4 Hz, 1H). <sup>13</sup>C NMR (175 MHz, CDCl<sub>3</sub>): 171.3, 135.0, 134.3, 132.0, 129.5 (2C), 129.1 (2C), 128.3, 127.4, 126.2, 122.8, 112.6, 109.5, 107.1, 67.3, 60.7, 43.9, 42.9, 42.5, 39.6, 35.7, 32.8, 31.5, 26.1. LCMS (ESI) *m/z*: 388.2383 calculated for C<sub>25</sub>H<sub>30</sub>N<sub>3</sub>O<sup>+</sup> ([M + H]<sup>+</sup>); 388.2448 observed.

### ***N*-(3-Phenylpropanoyl) ergoline derivative (S10)**

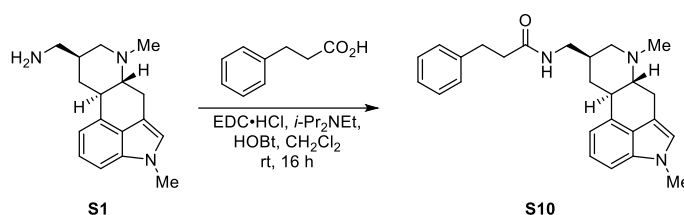

According to General Procedure A, *i*-Pr<sub>2</sub>NEt (58 μL, 0.33 mmol) was added to a solution of amine **S1** (30 mg, 0.11 mmol), EDC·HCl (25 mg, 0.13 mmol), HOBT (18 mg, 0.13 mmol), and hydrocinnamic acid (20 mg, 0.13 mmol) in CH<sub>2</sub>Cl<sub>2</sub> (5 mL). After stirring the reaction mixture overnight at rt for 16 h, it was diluted with CH<sub>2</sub>Cl<sub>2</sub> (25 mL), washed with saturated Na<sub>2</sub>CO<sub>3</sub> (20 mL), dried over Na<sub>2</sub>SO<sub>4</sub>, and concentrated under reduced pressure to give a yellow solid. Flash chromatography (0→15% MeOH/CH<sub>2</sub>Cl<sub>2</sub>) provided amide **S10** as a pale yellow oil that later solidified (36 mg, 0.089 mmol, 81%). *R*<sub>f</sub> = 0.19 (5% MeOH/CH<sub>2</sub>Cl<sub>2</sub>). <sup>1</sup>H NMR (700 MHz, CDCl<sub>3</sub>): 7.29 (t, *J* = 7.6 Hz, 2H), 7.23 (d, *J* = 7.1 Hz, 2H), 7.20–7.16 (m, 2H), 7.12 (d, *J* = 8.2 Hz, 1H), 6.85 (d, *J* = 7.0 Hz, 1H), 6.73 (s, 1H), 5.41 (brs, 1H), 3.75 (s, 3H), 3.37 (dd, *J* = 14.6, 4.3 Hz, 1H), 3.27 (dt, *J* = 13.7, 6.9 Hz, 1H), 3.22–3.16 (m, 1H), 3.02–2.97 (m, 2H), 2.94–2.87 (m, 2H), 2.70–2.64 (m, 1H), 2.57–2.47 (m, 3H), 2.44 (s, 3H), 2.11 (td, *J* = 10.8 Hz, *J* = 4.3 Hz, 1H), 2.05–1.95 (m, 1H), 1.89 (t, *J* = 11.3 Hz, 1H), 1.08 (q, *J* = 12.3 Hz, 1H). <sup>13</sup>C NMR (175 MHz, CDCl<sub>3</sub>): 172.2, 140.9, 134.5, 133.3, 128.7 (2C), 128.5 (2C), 126.6, 126.5, 122.8, 122.7, 112.7, 110.8, 107.0, 67.5, 61.5, 43.5, 43.4, 40.6, 38.7, 36.7, 32.9, 32.2, 31.9, 27.1. LCMS (ESI) *m/z*: 402.2540



calculated for  $C_{26}H_{32}N_3O^+$  ( $[M + H]^+$ ); 402.2536 observed.

### *N*-(*N*-Boc-L-Phenylalanyl) ergoline derivative (**S12**)

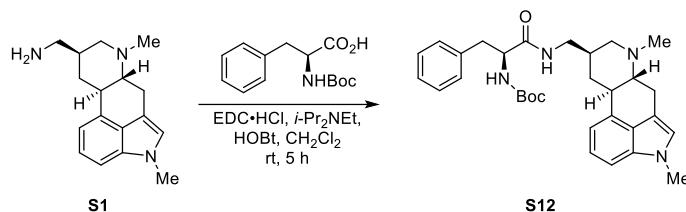

According to General Procedure A, *i*-Pr<sub>2</sub>NEt (117  $\mu$ L, 0.67 mmol) was added to a solution of amine **S1** (60 mg, 0.22 mmol), EDC·HCl (51 mg, 0.27 mmol), HOBT (36 mg, 0.27 mmol), and *N*-Boc-L-phenylalanine (65 mg, 0.13 mmol) in CH<sub>2</sub>Cl<sub>2</sub> (10 mL). After stirring the reaction mixture at rt for 3.5 h, it was diluted with CH<sub>2</sub>Cl<sub>2</sub> (25 mL), washed with saturated Na<sub>2</sub>CO<sub>3</sub> (20 mL), dried over Na<sub>2</sub>SO<sub>4</sub>, and concentrated under reduced pressure to give a yellow oily solid. Flash chromatography (0→10% MeOH/CH<sub>2</sub>Cl<sub>2</sub>) provided the *N*-Boc-Phe derivative **S12** as an off-white solid (69.3 mg, 0.13 mmol, 60%).  $R_f = 0.19$  (5% MeOH/CH<sub>2</sub>Cl<sub>2</sub>). Mp: 210–213 °C. <sup>1</sup>H NMR (700 MHz, CDCl<sub>3</sub>):  $\delta$  7.31 (t,  $J = 7.5$  Hz, 2H), 7.24 (d,  $J = 7.3$  Hz, 2H), 7.22–7.16 (m, 2H), 7.11 (d,  $J = 8.1$  Hz, 1H), 6.82 (d,  $J = 7.0$  Hz, 1H), 6.73 (s, 1H), 5.79 (brs, 1H), 5.10 (brs, 1H), 4.31 (brs, 1H), 3.76 (s, 3H), 3.36 (dd,  $J = 14.6, 4.2$  Hz, 1H), 3.23 (dt,  $J = 12.9, 6.2$  Hz, 1H), 3.15–3.08 (m, 2H), 3.08–3.00 (m, 1H), 2.89–2.80 (m, 2H), 2.65 (app t,  $J = 12.4$ , Hz, 1H), 2.42 (s, 3H), 2.08 (td,  $J = 10.5$  Hz,  $J = 4.0$  Hz, 1H), 2.00–1.91 (m, 1H), 1.83 (t,  $J = 11.1$  Hz, 1H), 1.00 (q,  $J = 12.2$  Hz, 1H). <sup>13</sup>C NMR (175 MHz, CDCl<sub>3</sub>):  $\delta$  171.3, 155.6, 137.0, 134.5, 133.3, 129.4 (4C), 128.9, 127.3, 126.6, 122.8, 122.6, 112.8, 110.8, 106.9, 80.4, 67.4, 61.4, 43.5, 43.4, 40.6, 38.9, 36.3, 32.9, 32.1, 28.5 (3C), 27.1. LCMS (ESI)  $m/z$ : 517.3173 calculated for  $C_{31}H_{41}N_4O_3^+$  ( $[M + H]^+$ ); 517.3384 observed.

## *N*-L-Phenylalanine ergoline derivative (**S11**)

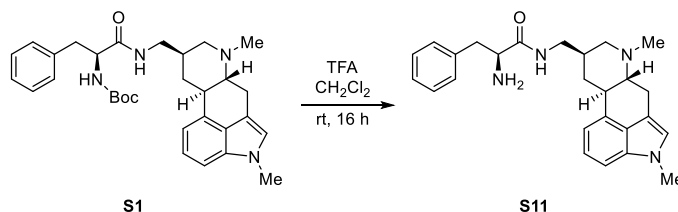

TFA (3 mL) was added to a stirring solution of the Boc-protected Phe derivative **S1** (49 mg, 0.12 mmol) in CH<sub>2</sub>Cl<sub>2</sub> (10 mL) and the reaction mixture stirred at rt for 2.5 h. The reaction mixture was concentrated under reduced pressure, redissolved in CH<sub>2</sub>Cl<sub>2</sub> (25 mL), and washed with saturated Na<sub>2</sub>CO<sub>3</sub> (25 mL). The organic solution was dried over Na<sub>2</sub>SO<sub>4</sub>, concentrated under reduced pressure, and flash chromatography (0→25% MeOH/CH<sub>2</sub>Cl<sub>2</sub>) provided the free amine **S11** as a white amorphous solid (40 mg, 0.095 mmol, 80%). *R*<sub>f</sub> = 0.30 (10% MeOH/CH<sub>2</sub>Cl<sub>2</sub>). <sup>1</sup>H NMR (600 MHz, CDCl<sub>3</sub>): 7.47–7.43 (m, 1H), 7.33 (t, *J* = 7.6 Hz, 2H), 7.27–7.24 (m, 3H), 7.19 (dd, *J* = 7.1, 8.2 Hz, 1H), 7.12 (d, *J* = 8.2 Hz, 1H), 6.85 (d, *J* = 7.1 Hz, 1H), 6.73 (s, 1H), 3.75 (s, 3H), 3.64 (dd, *J* = 9.2, 4.1 Hz, 1H), 3.38 (dd, *J* = 14.6, 4.3 Hz, 1H), 3.33–3.27 (m, 3H), 3.03 (brd, *J* = 11.2 Hz, 1H), 3.00–2.96 (m, 1H), 2.75–2.67 (m, 2H), 2.63 (brd, *J* = 12.8 Hz, 1H), 2.49 (s, 3H), 2.17 (td, *J* = 10.7 Hz, *J* = 4.3 Hz, 1H), 2.15–2.10 (m, 1H), 2.00 (t, *J* = 11.4 Hz, 1H), 1.08 (q, *J* = 12.4 Hz, 1H). <sup>13</sup>C NMR (150 MHz, CDCl<sub>3</sub>): 174.4, 137.9, 134.4, 133.1, 129.3 (2C), 128.8 (2C), 126.9, 126.4, 122.7, 122.6, 112.6, 110.5, 106.9, 67.4, 61.4, 56.6, 43.3, 42.8, 41.1, 40.4, 36.5, 32.8, 32.0, 26.8. LCMS (ESI) *m/z*: 417.2649 calculated for C<sub>26</sub>H<sub>33</sub>N<sub>4</sub>O<sup>+</sup> ([M + H]<sup>+</sup>); 417.2723 observed.

## *N*-*trans*-Cinnamoyl ergoline derivative (MLBC-01)

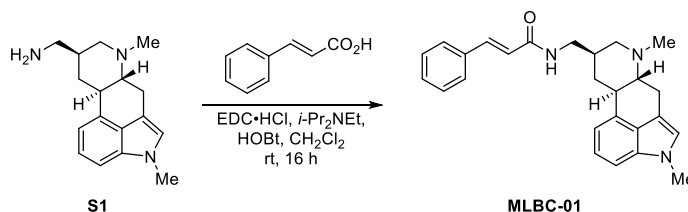

According to General Procedure A, *i*-Pr<sub>2</sub>NEt (58 μL, 0.33 mmol) was added to a solution of amine **S1** (30 mg, 0.11 mmol), EDC·HCl (25 mg, 0.13 mmol), HOBT (18 mg, 0.13 mmol), and *trans*-cinnamic acid (20 mg, 0.14 mmol) in CH<sub>2</sub>Cl<sub>2</sub> (5 mL). After stirring the reaction mixture at rt

for 5 h, it was diluted with CH<sub>2</sub>Cl<sub>2</sub> (25 mL), washed with saturated Na<sub>2</sub>CO<sub>3</sub> (20 mL), dried over Na<sub>2</sub>SO<sub>4</sub>, and concentrated under reduced pressure to give a yellow oily solid. Flash chromatography (0→15% MeOH/CH<sub>2</sub>Cl<sub>2</sub>) provided the *N*-cinnamoyl derivative **MLBC-01** as a pale yellow amorphous solid (31 mg, 0.078 mmol, 71%). *R*<sub>f</sub> = 0.24 (5% MeOH/CH<sub>2</sub>Cl<sub>2</sub>). <sup>1</sup>H NMR (700 MHz, CDCl<sub>3</sub>): 7.66 (d, *J* = 15.6 Hz, 1H), 7.52 (d, *J* = 6.7 Hz, 1H), 7.40–7.34 (m, 3H), 7.18 (dd, *J* = 7.1, 8.2 Hz, 1H), 7.11 (d, *J* = 8.2 Hz, 1H), 6.91 (d, *J* = 7.1 Hz, 1H), 6.73 (s, 1H), 6.43 (d, *J* = 15.6 Hz, 1H), 5.73 (brs, 1H), 3.76 (s, 3H), 3.48–3.40 (m, 2H), 3.39 (dd, *J* = 14.6, 4.3 Hz, 1H), 3.10 (app d, *J* = 11.1 Hz, 1H), 3.02–1.98 (m, 1H), 2.75–2.67 (m, 2H), 2.49 (s, 3H), 2.23–2.19 (brs, 1H), 2.19 (td, *J* = 10.6 Hz, *J* = 4.2 Hz, 1H), 2.06 (app t, *J* = 11.7 Hz, 1H), 1.23 (q, *J* = 12.4 Hz, 1H). <sup>13</sup>C NMR (175 MHz, CDCl<sub>3</sub>): 166.2, 141.4, 135.0, 134.5, 133.3, 129.8, 129.0 (2C), 128.0 (2C), 126.6, 122.9, 122.7, 120.7, 112.7, 10.8, 107.0, 67.5, 61.6, 43.6, 43.5, 40.7, 37.0, 32.9, 32.3, 27.1. LCMS (ESI) *m/z*: 400.2383 calculated for C<sub>26</sub>H<sub>32</sub>N<sub>3</sub>O<sup>+</sup> ([M + H]<sup>+</sup>); 400.2438 observed.

#### ***N*-(4-Chloro-*trans*-cinnamoyl) ergoline derivative (MLBC-02)**

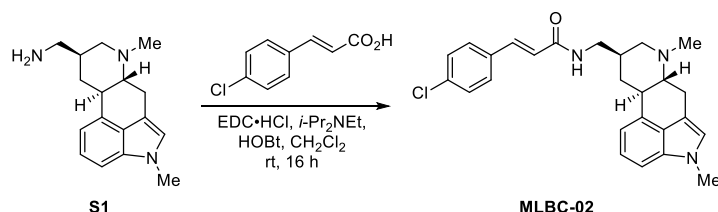

According to General Procedure A, *i*-Pr<sub>2</sub>NEt (194 μL, 1.11 mmol) was added to a solution of amine **S1** (100 mg, 0.37 mmol), EDC·HCl (85 mg, 0.44 mmol), HOBT (60 mg, 0.44 mmol), and 4-chlorocinnamic acid (81 mg, 0.44 mmol) in CH<sub>2</sub>Cl<sub>2</sub> (10 mL). After stirring the reaction mixture overnight at rt for 16 h, it was diluted with CH<sub>2</sub>Cl<sub>2</sub> (50 mL), washed with saturated Na<sub>2</sub>CO<sub>3</sub> (2 × 40 mL), dried over Na<sub>2</sub>SO<sub>4</sub>, and concentrated under reduced pressure to give an off-white solid. Flash chromatography (0→15% MeOH/CH<sub>2</sub>Cl<sub>2</sub>) provided amide **MLBC-02** as a white solid (133 mg, 0.31 mmol, 83%). <sup>1</sup>H NMR (700 MHz, CDCl<sub>3</sub>): 7.60 (d, *J* = 15.6 Hz, 1H, H<sub>20</sub>), 7.44 (d, *J* = 8.1 Hz, 2H, H<sub>22</sub>), 7.34 (d, *J* = 8.1 Hz, 2H, H<sub>23</sub>), 7.18 (dd, *J* = 8.2, 7.1 Hz, 1H, H<sub>13</sub>), 7.11 (d, *J* = 8.2 Hz, 1H, H<sub>14</sub>), 6.89 (d, *J* = 7.1 Hz, 1H, H<sub>12</sub>), 6.73 (s, 1H, H<sub>2</sub>), 6.42 (d, *J* = 15.6 Hz, 1H, H<sub>19</sub>), 5.94–5.87 (brs, 1H, NH), 3.76 (s, 3H, C<sub>1</sub>'), 3.46 (dt, *J* = 14.1, 7.2 Hz, 1H, H<sub>8</sub>'A), 3.43–3.36 (m, 2H, H<sub>8</sub>'B + H<sub>4</sub><sub>eq</sub>), 3.16 (app d, *J* = 11.2, 1H, H<sub>7</sub><sub>eq</sub>), 3.08 (brt, *J* = 10.6, 3.1 Hz, 1H, H<sub>10</sub>), 2.78 (app t, *J* = 12.8 Hz, 1H, H<sub>4</sub><sub>ax</sub>), 2.72 (brd, *J* = 10.6, 3.1 Hz, 1H, H<sub>9</sub><sub>eq</sub>), 2.54 (s, 3H), 2.32–2.23 (m,

2H, H5 + H8), 2.13 (app t,  $J = 11.2$  Hz, 1H, H7<sub>ax</sub>), 1.24 (app q,  $J = 12.4$  Hz, 1H, H9<sub>ax</sub>). <sup>13</sup>C NMR (150 MHz, CDCl<sub>3</sub>): 166.0, 140.1, 135.7, 134.5, 133.4, 132.8, 129.2 (2C), 129.1 (2C), 126.5, 122.9, 122.8, 121.2, 112.7, 110.2 107.1, 67.6, 61.4, 43.5, 43.2, 40.3, 36.6, 33.0, 32.1, 26.8. LCMS (ESI)  $m/z$ : 434.1994 calculated for C<sub>26</sub>H<sub>29</sub><sup>35</sup>Cl N<sub>3</sub>O<sup>+</sup> ([M + H]<sup>+</sup>); 434.21842 observed.

## Supplementary References

1. Gottlieb HE, Kotlyar V, Nudelman A. NMR Chemical Shifts of Common Laboratory Solvents as Trace Impurities. *J Org Chem* **62**, 7512-7515 (1997).
2. Singh K, Kaur G, Mjambili F, Smith PJ, Chibale K. Synthesis of metergoline analogues and their evaluation as antiplasmodial agents. *MedChemComm* **5**, 165-170 (2014).
